# Supplementary material for: Modelling confounding effects from extracerebral contamination and systemic factors on functional near-infrared spectroscopy
Source: PubMed Central journal article supplement (PMC5139986; doi:10.1016/j.neuroimage.2016.08.058), 2016-12

# False Positive, Pressure + CO2

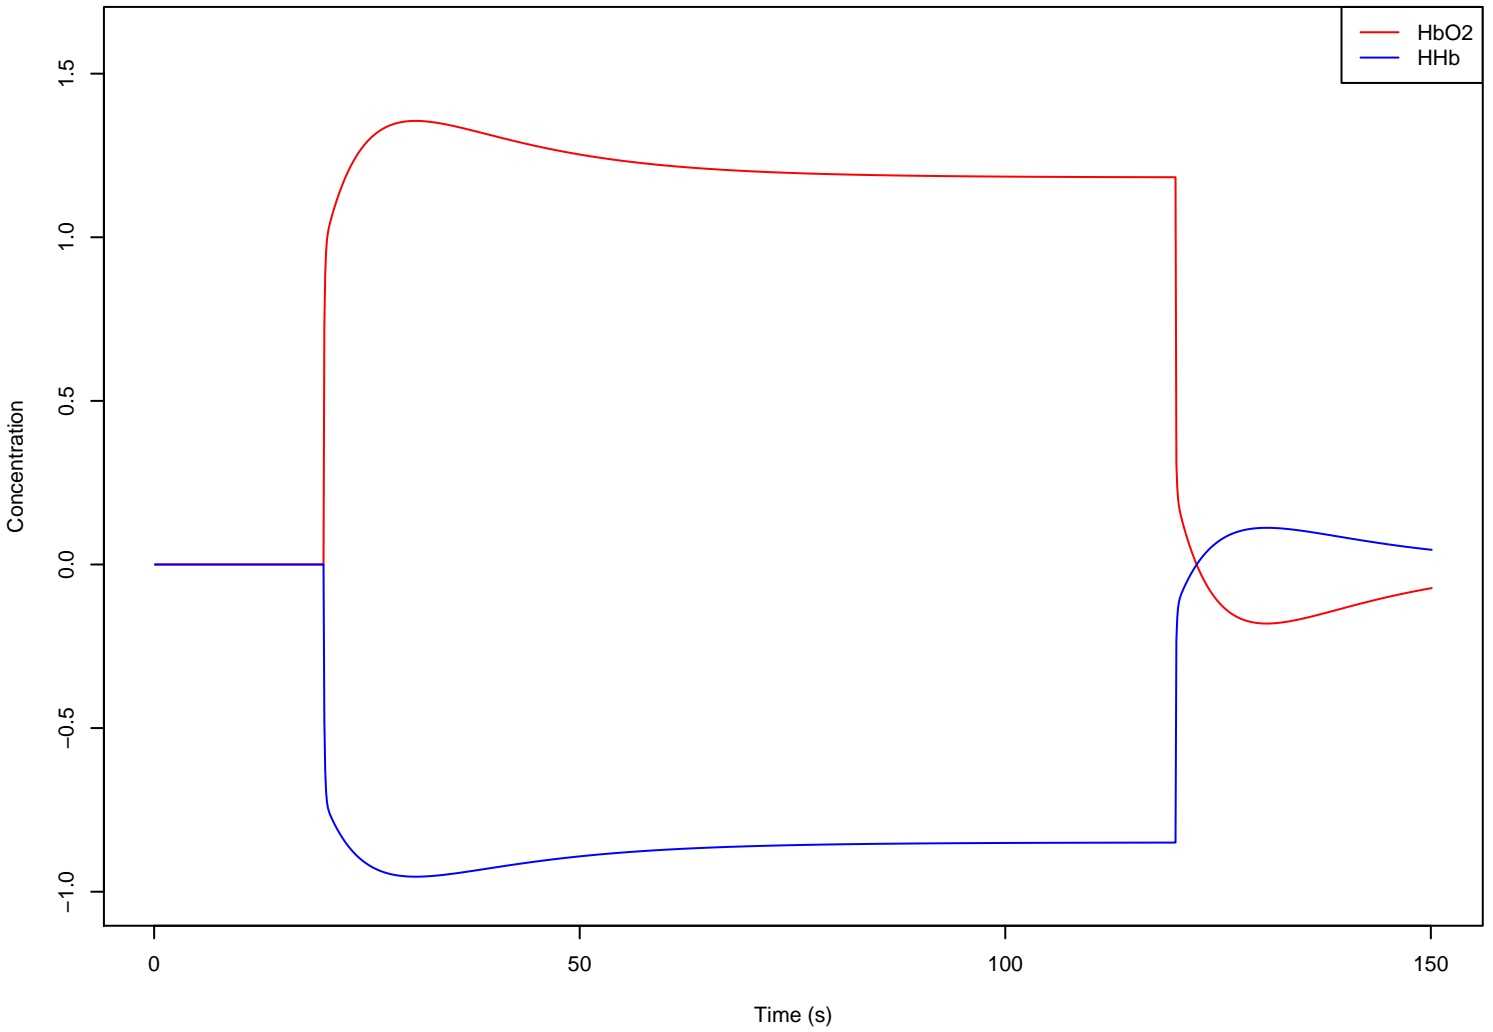

### Mean Arterial Pressure

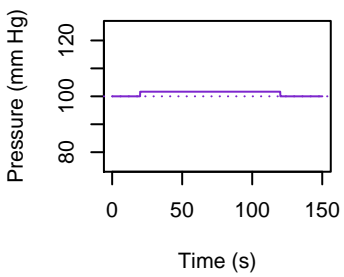

### Arterial CO2

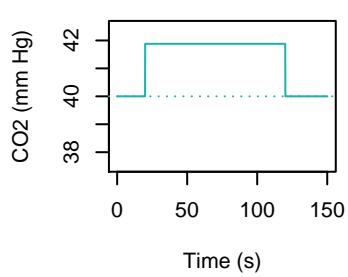

### Arterial O2 Saturation

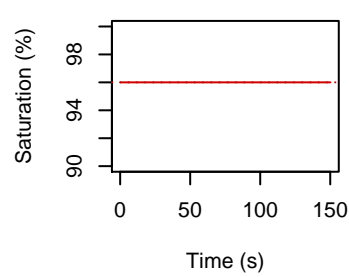

### Scalp Blood Flux

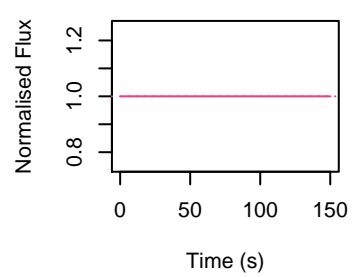

# False Positive, Pressure + CO2 + SaO2

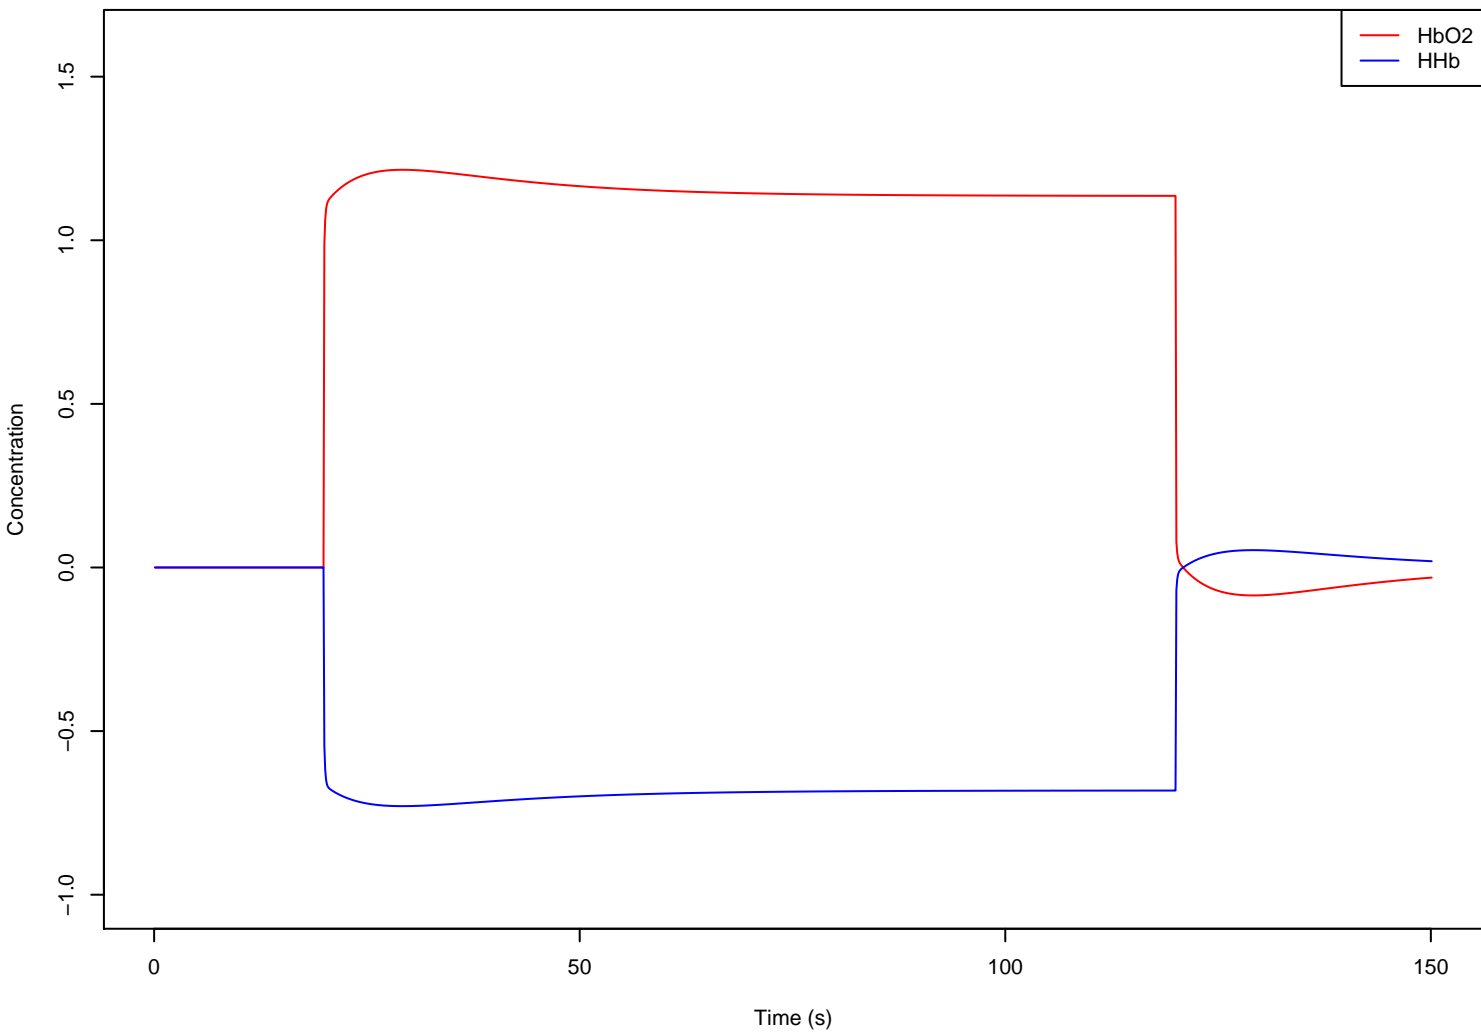

### Mean Arterial Pressure

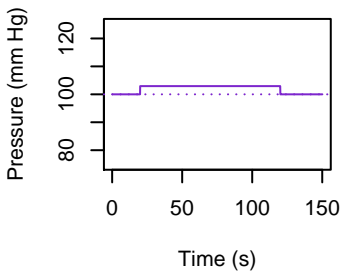

### Arterial CO2

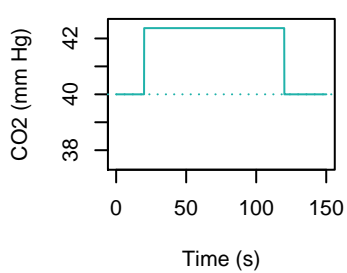

### Arterial O2 Saturation

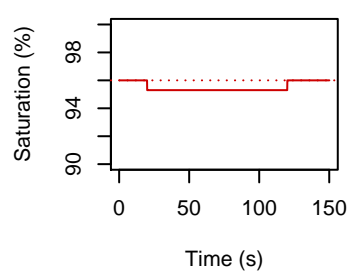

### Scalp Blood Flux

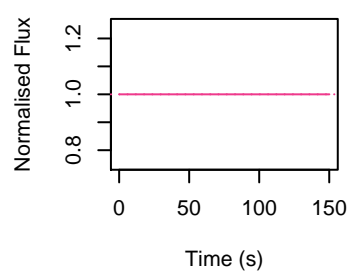

# False Positive, Pressure + CO2 + SaO2 + Scalp (94 %)

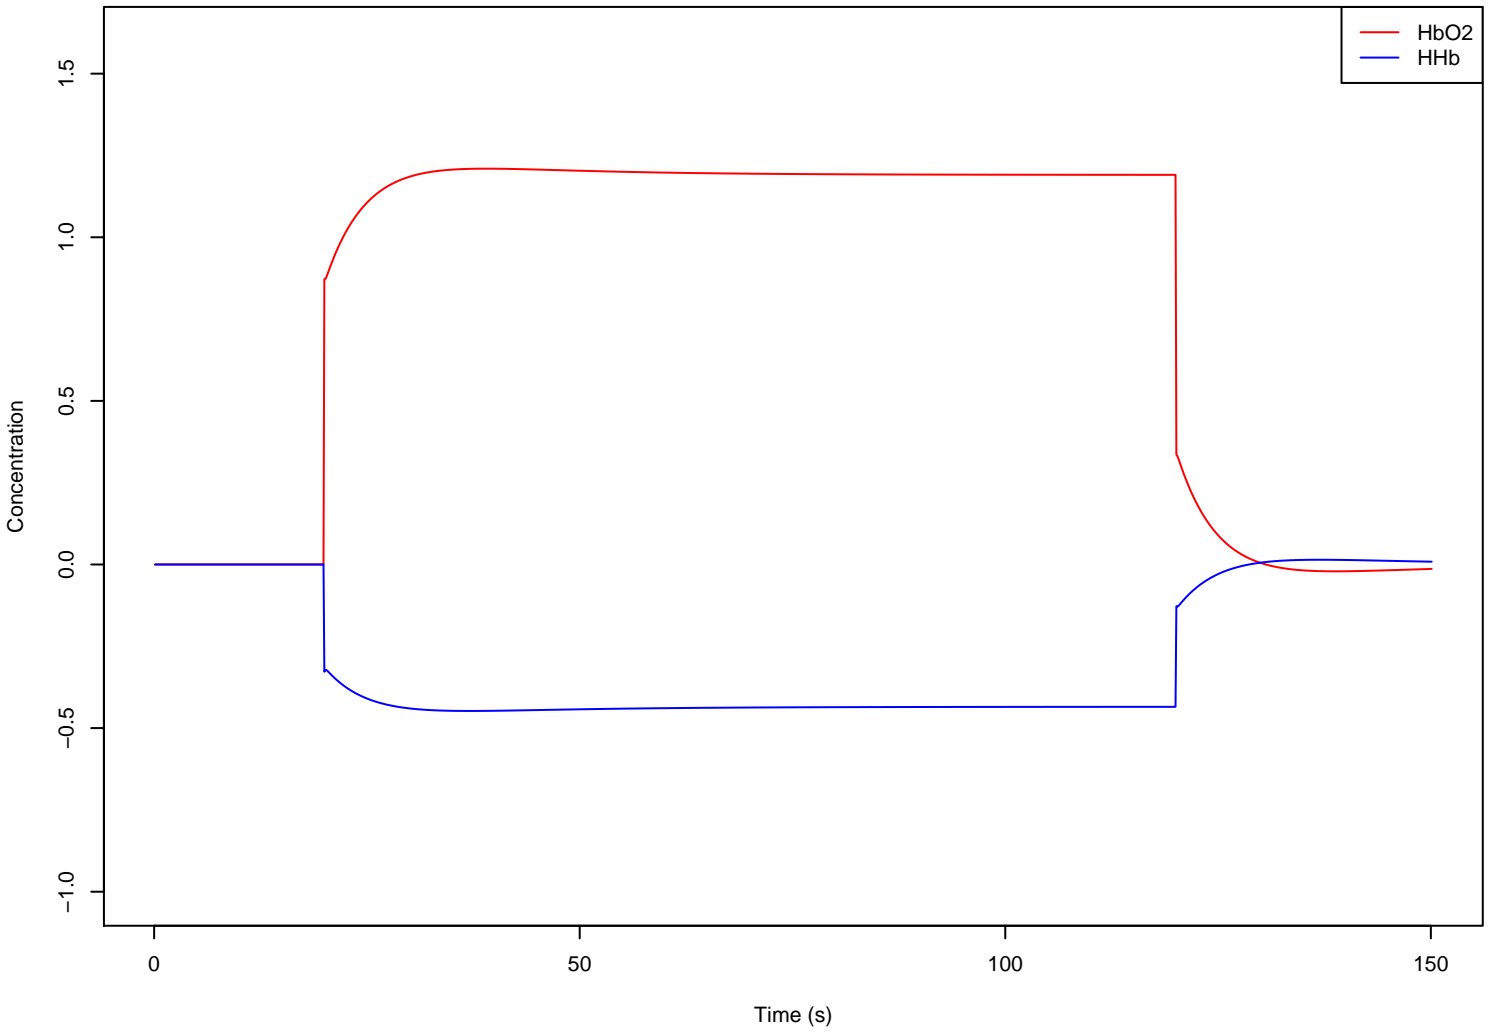

### Mean Arterial Pressure

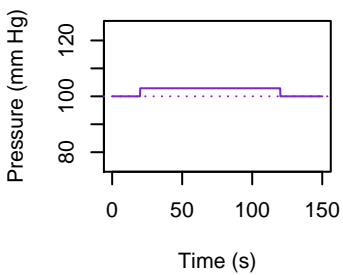

### Arterial CO2

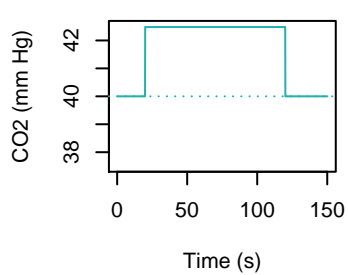

### Arterial O2 Saturation

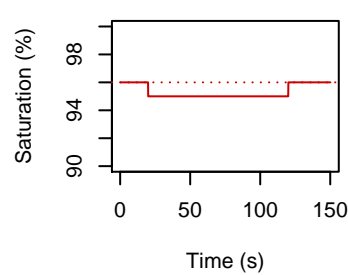

### Scalp Blood Flux

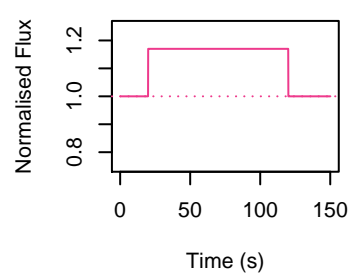

# False Negative (1), Pressure + CO2

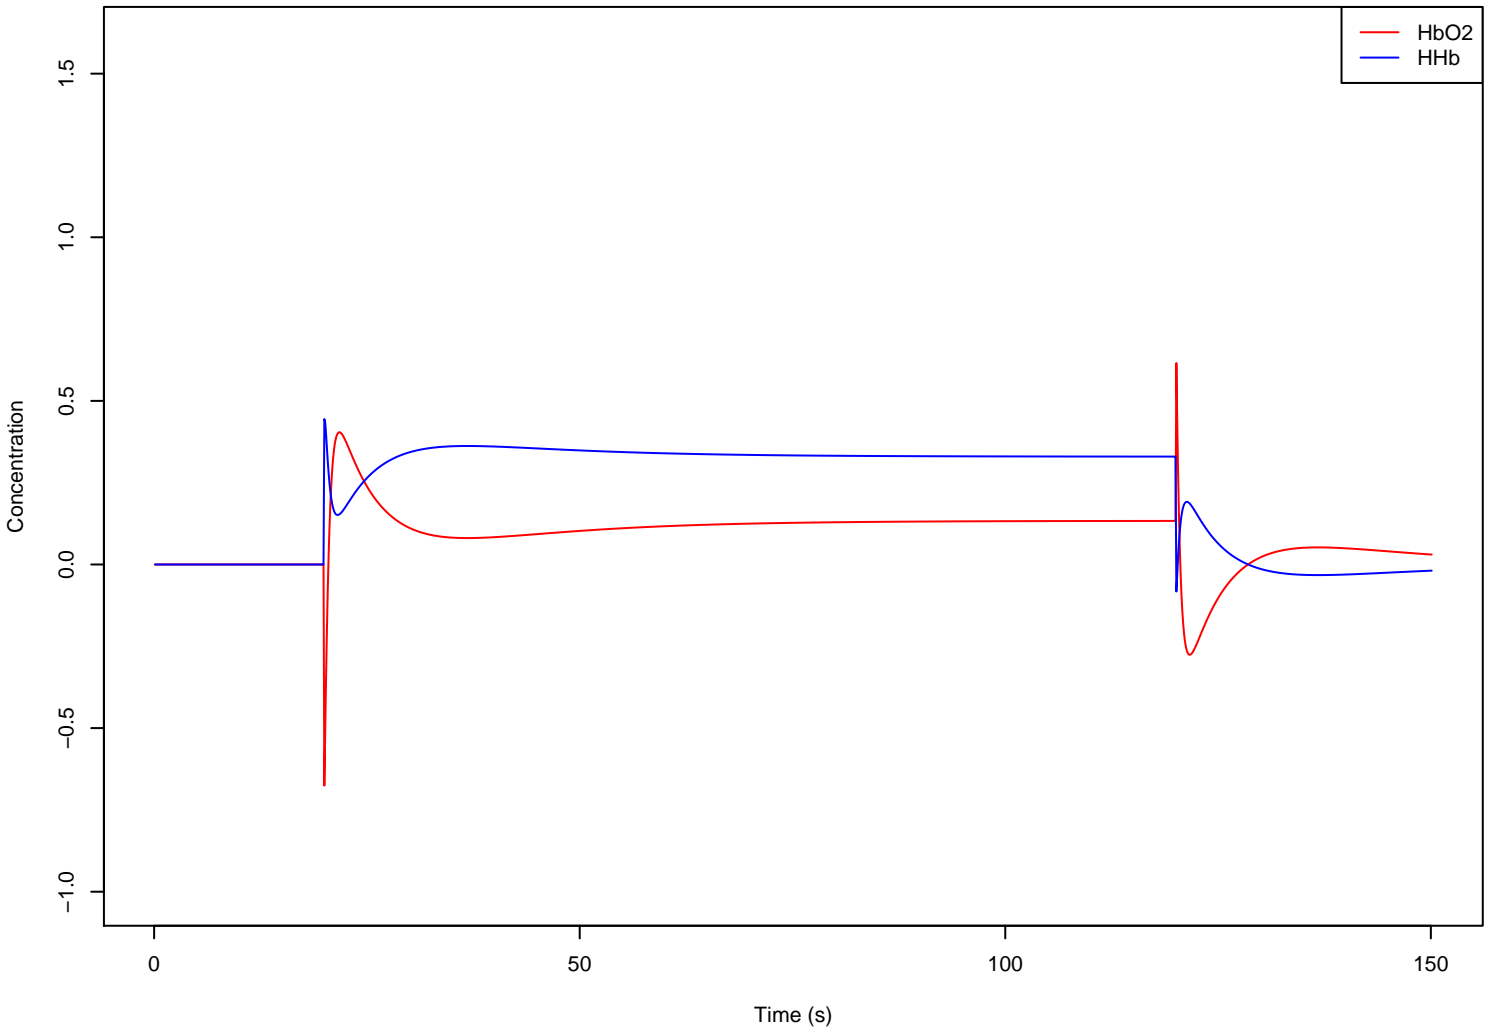

### Mean Arterial Pressure

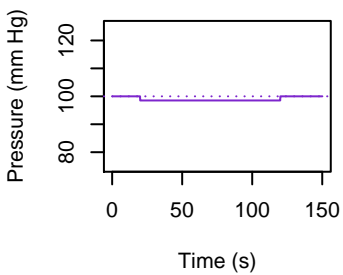

### Arterial CO2

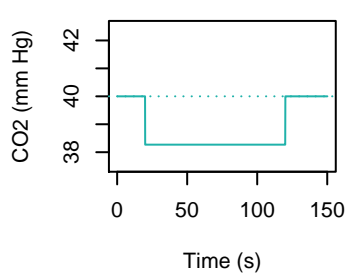

### Arterial O2 Saturation

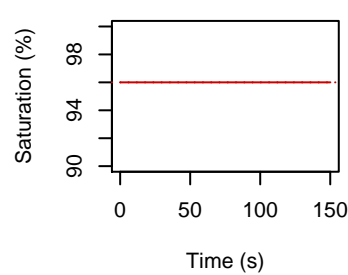

### Scalp Blood Flux

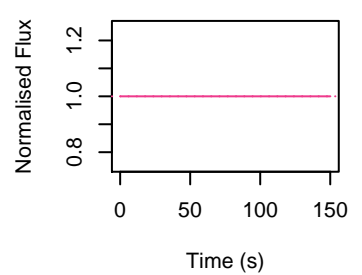

# False Negative (1), Pressure + CO2 + SaO2

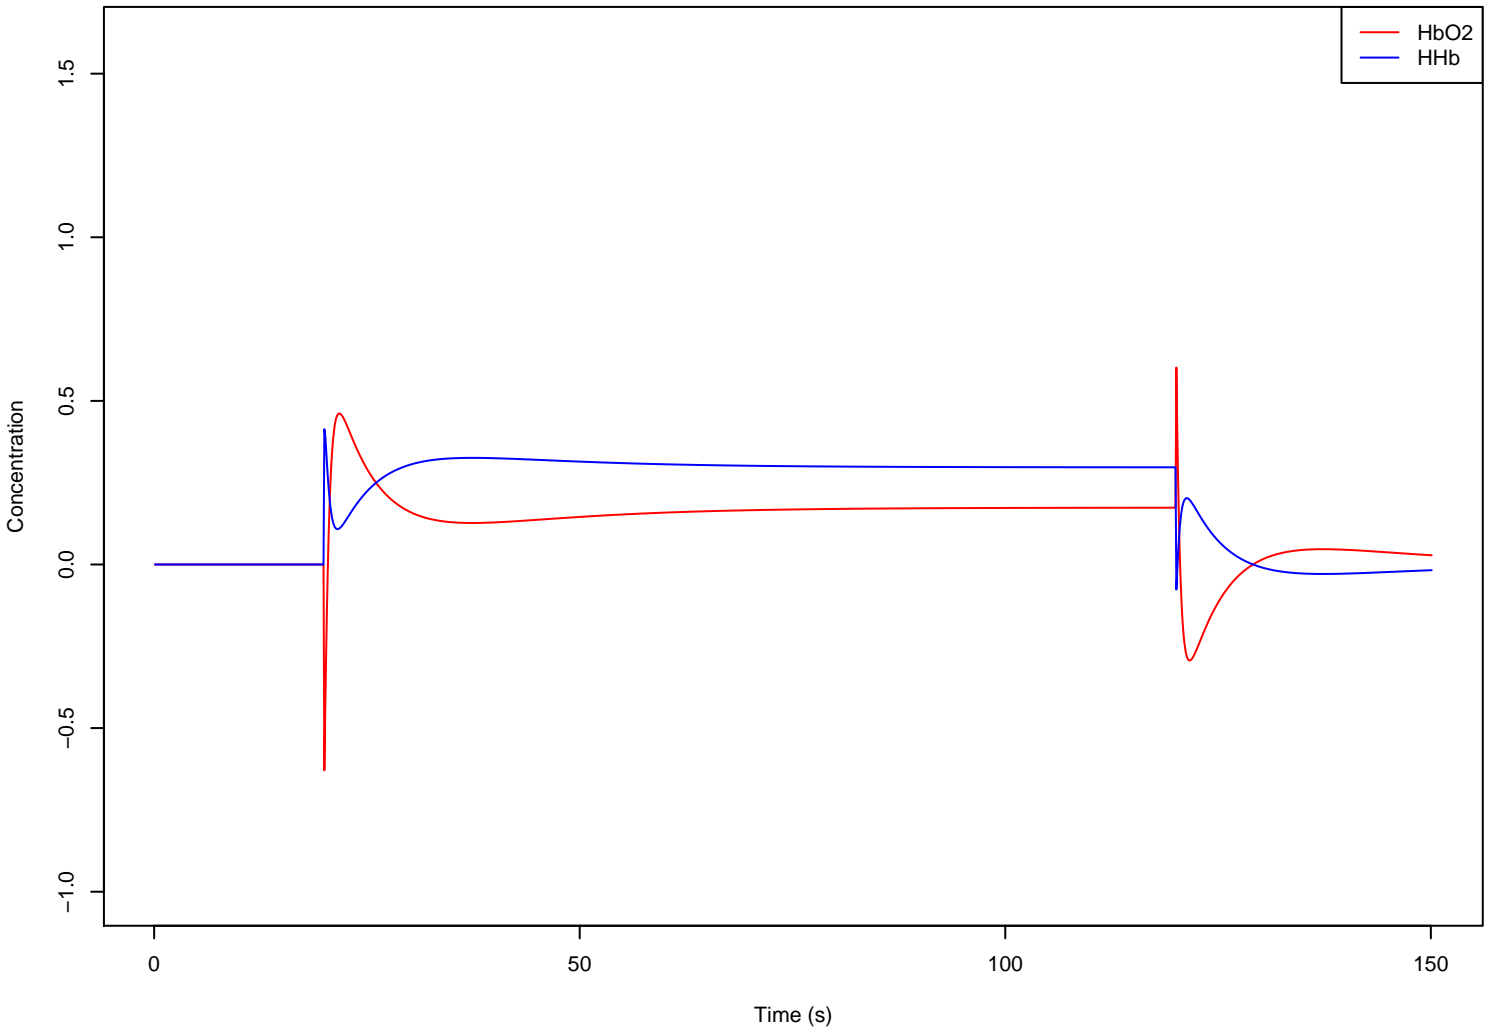

### Mean Arterial Pressure

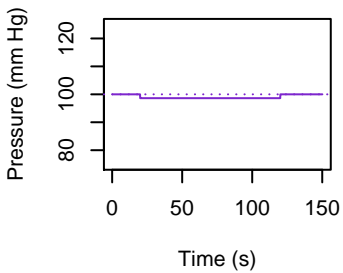

### Arterial CO2

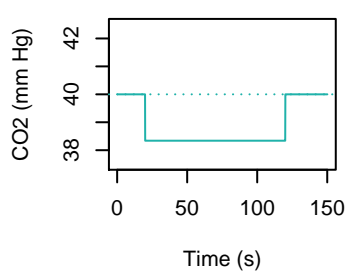

### Arterial O2 Saturation

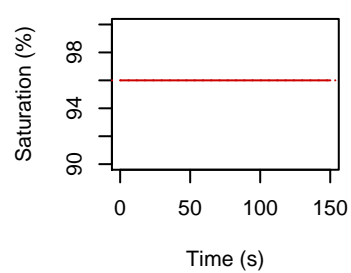

### Scalp Blood Flux

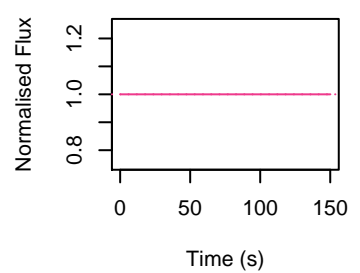

# False Negative (1), Pressure + CO2 + SaO2 + Scalp (99 %)

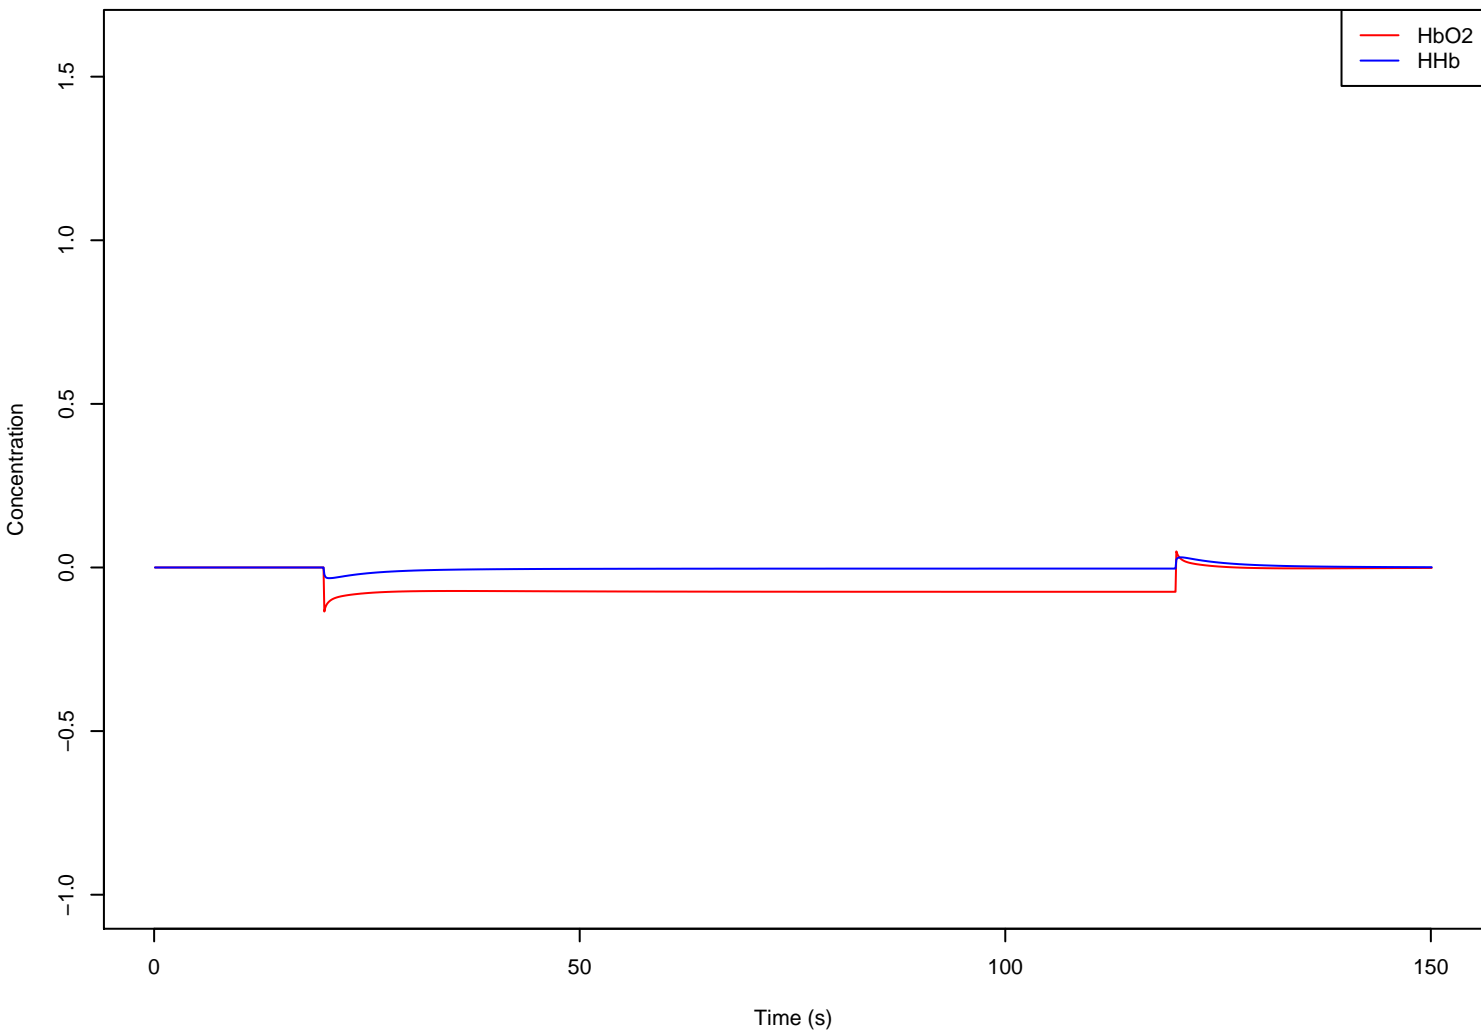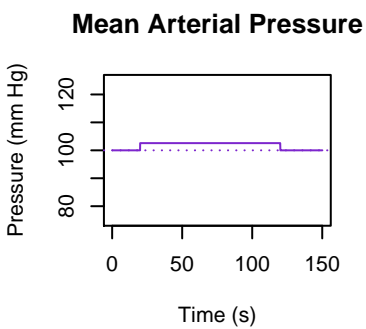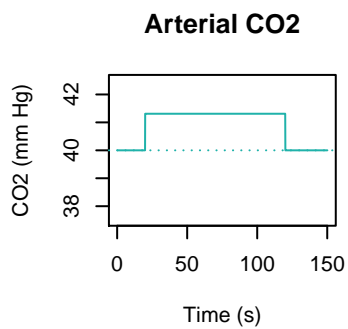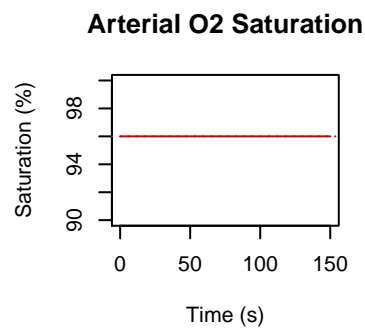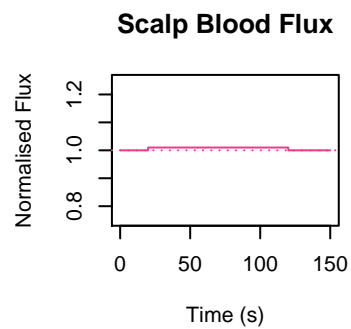

### False Negative (2), Pressure + CO2

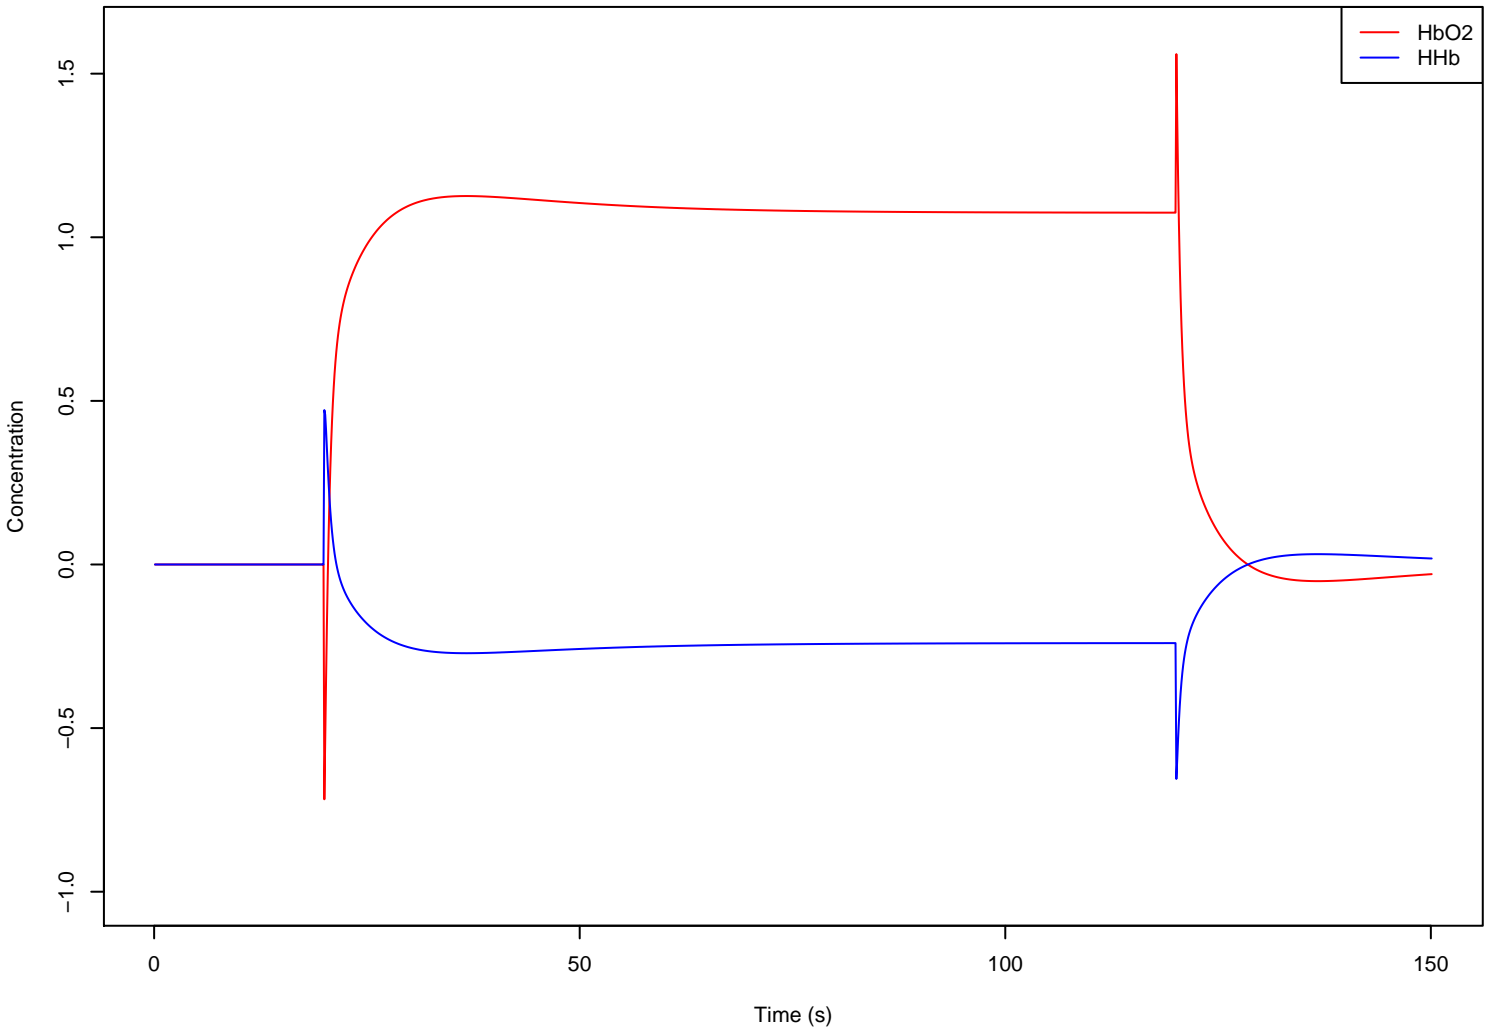

**Mean Arterial Pressure**

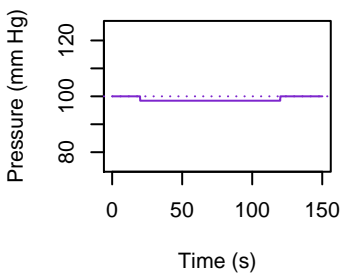

**Arterial CO2**

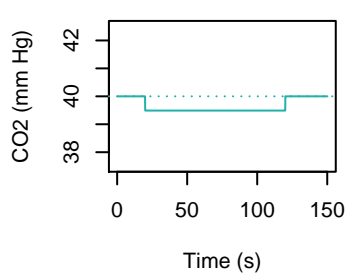

**Arterial O2 Saturation**

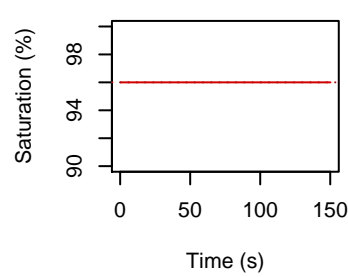

**Scalp Blood Flux**



### False Negative (2), Pressure + CO2 + SaO2

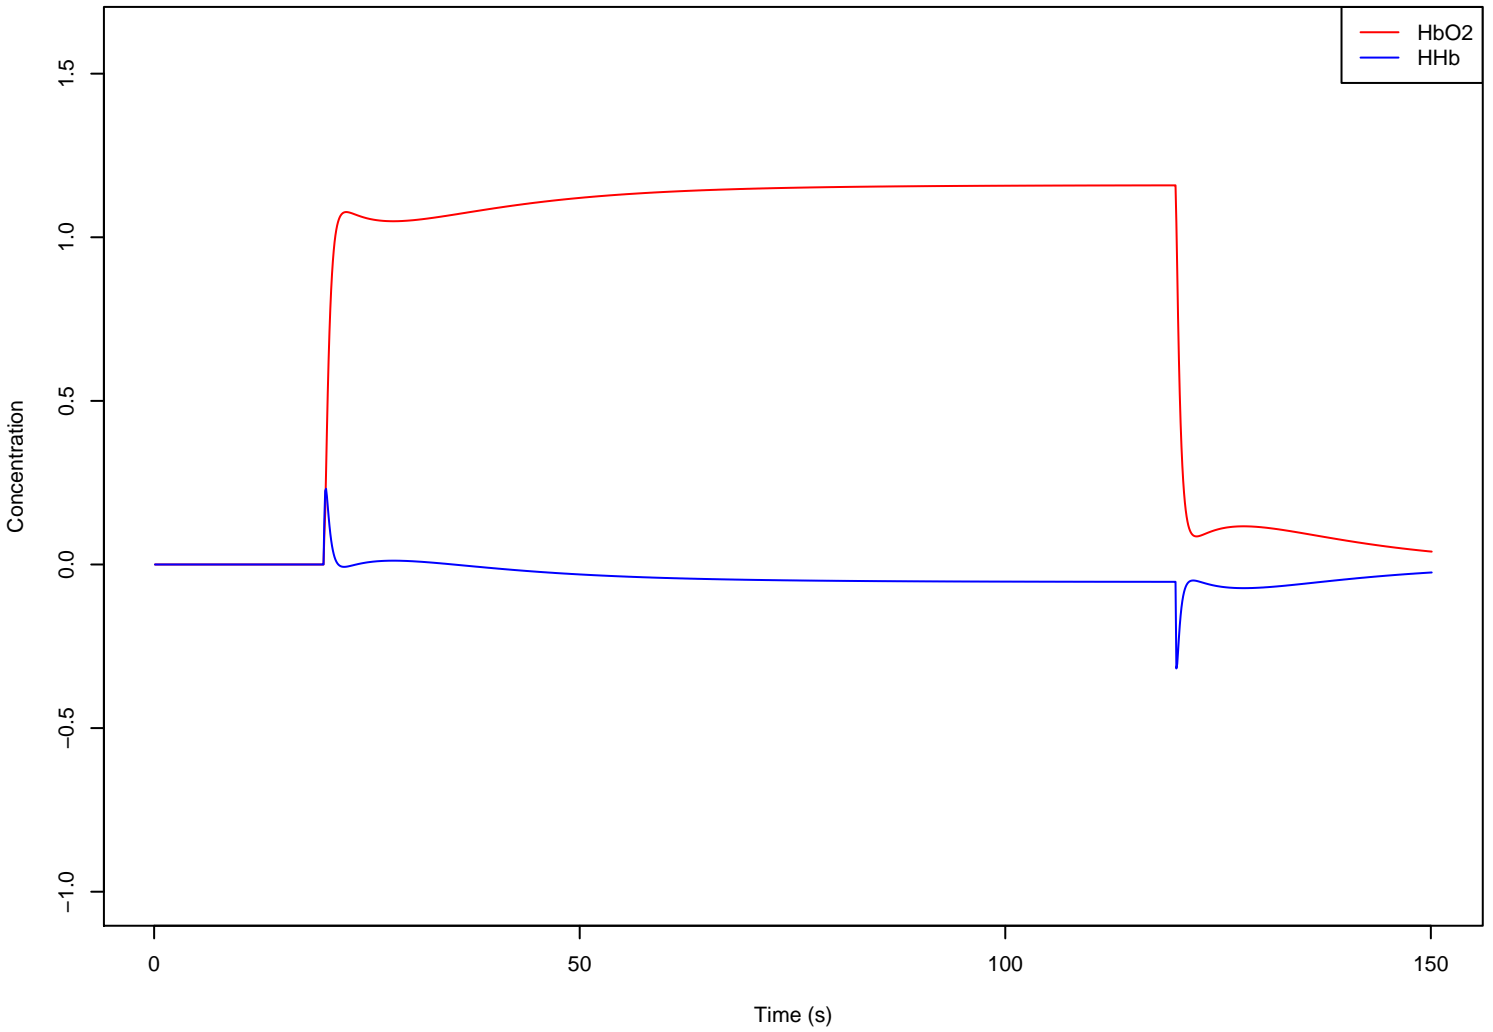

#### Mean Arterial Pressure

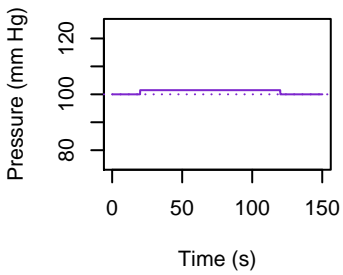

#### Arterial CO2

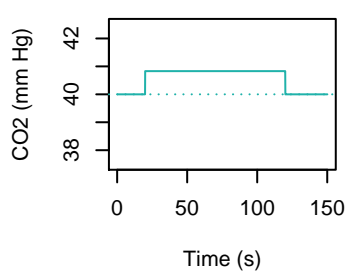

#### Arterial O2 Saturation

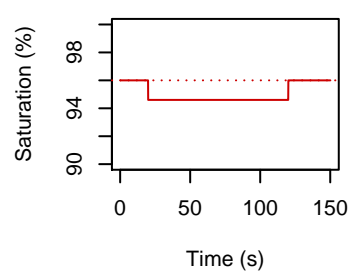

#### Scalp Blood Flux

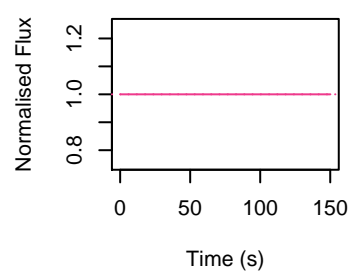



### False Negative (2), Pressure + CO2 + SaO2 + Scalp (98 %)

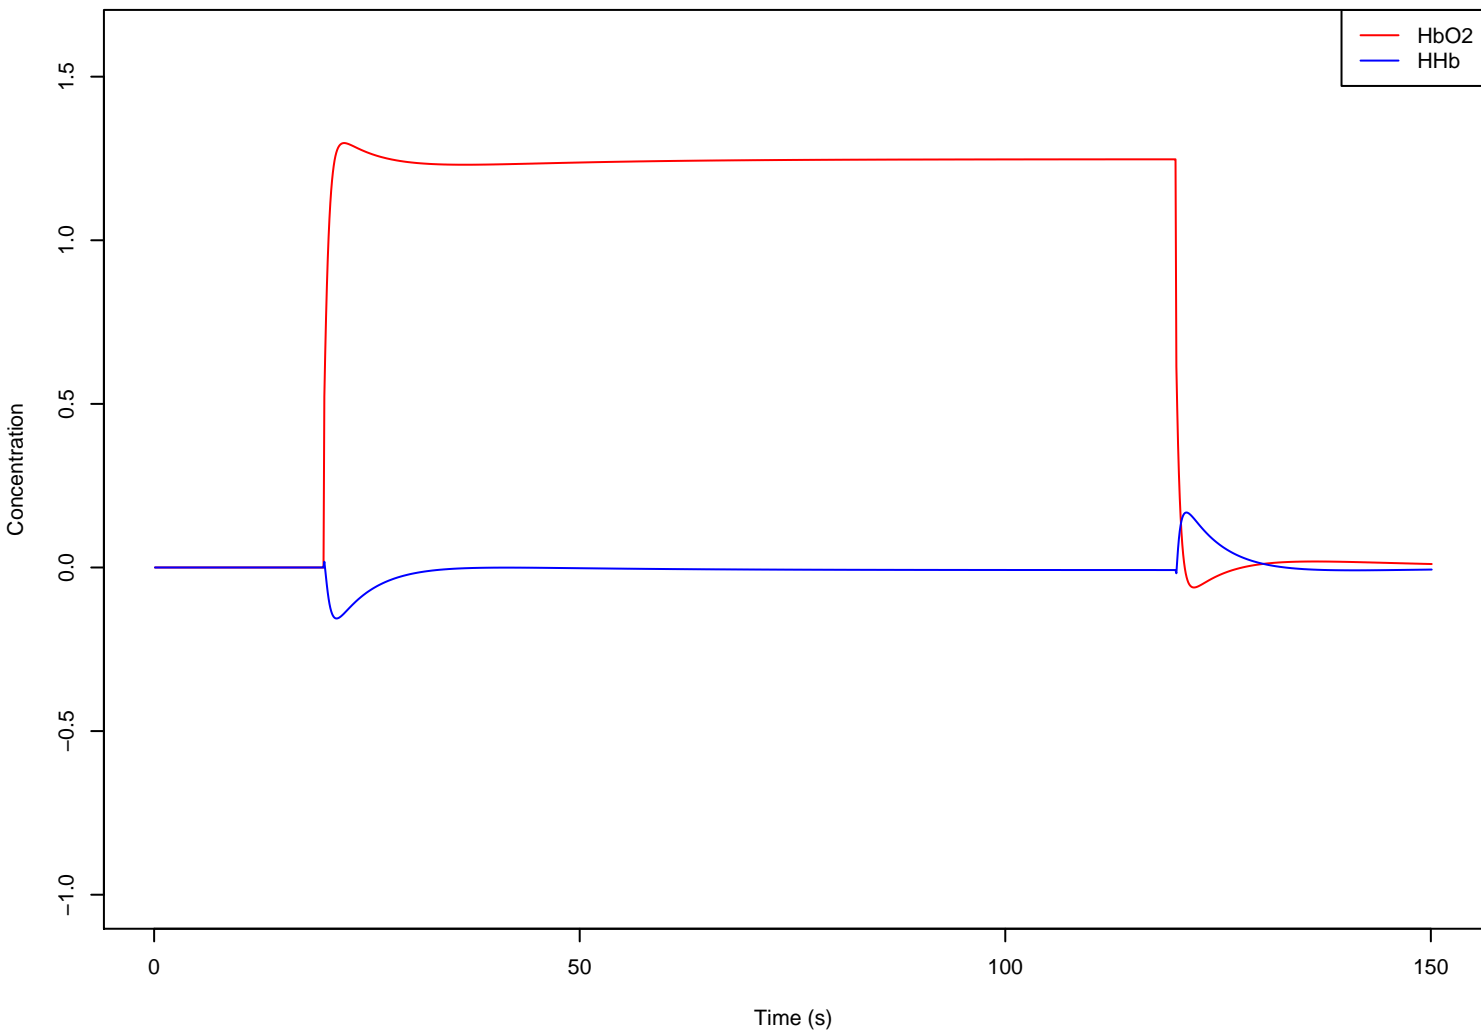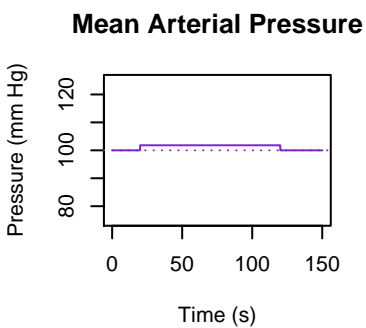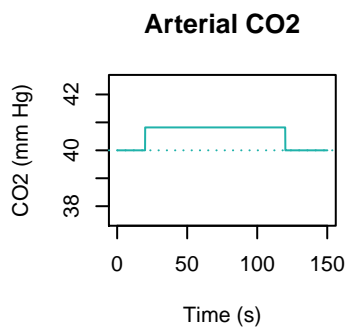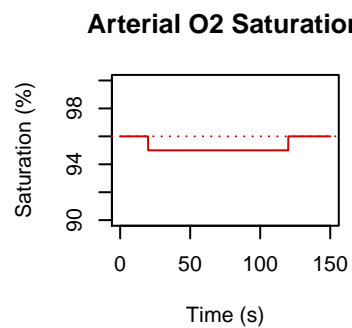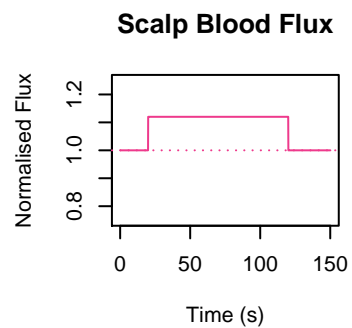

### False Negative (3), Pressure + CO2

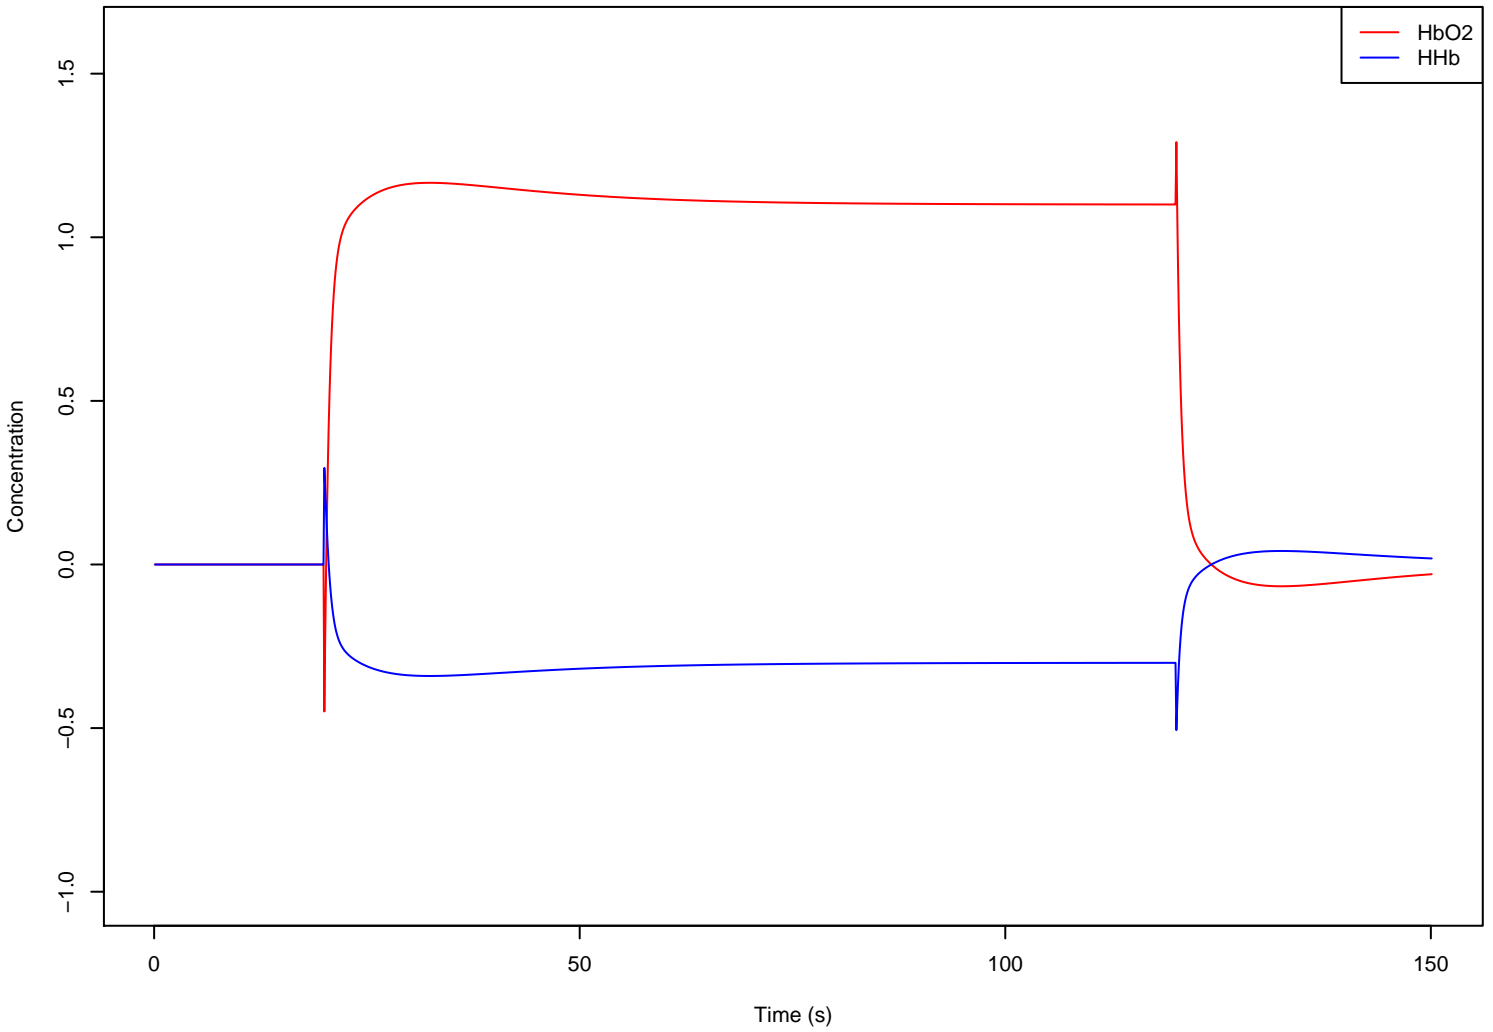

#### Mean Arterial Pressure

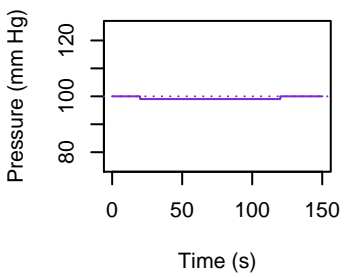

#### Arterial CO2

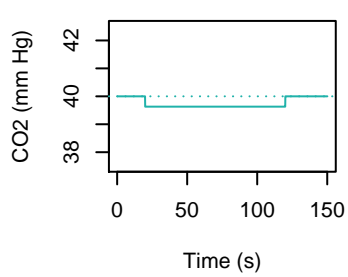

#### Arterial O2 Saturation



#### Scalp Blood Flux

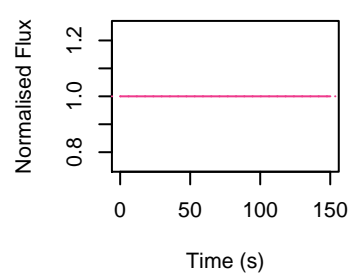

### False Negative (3), Pressure + CO2 + SaO2

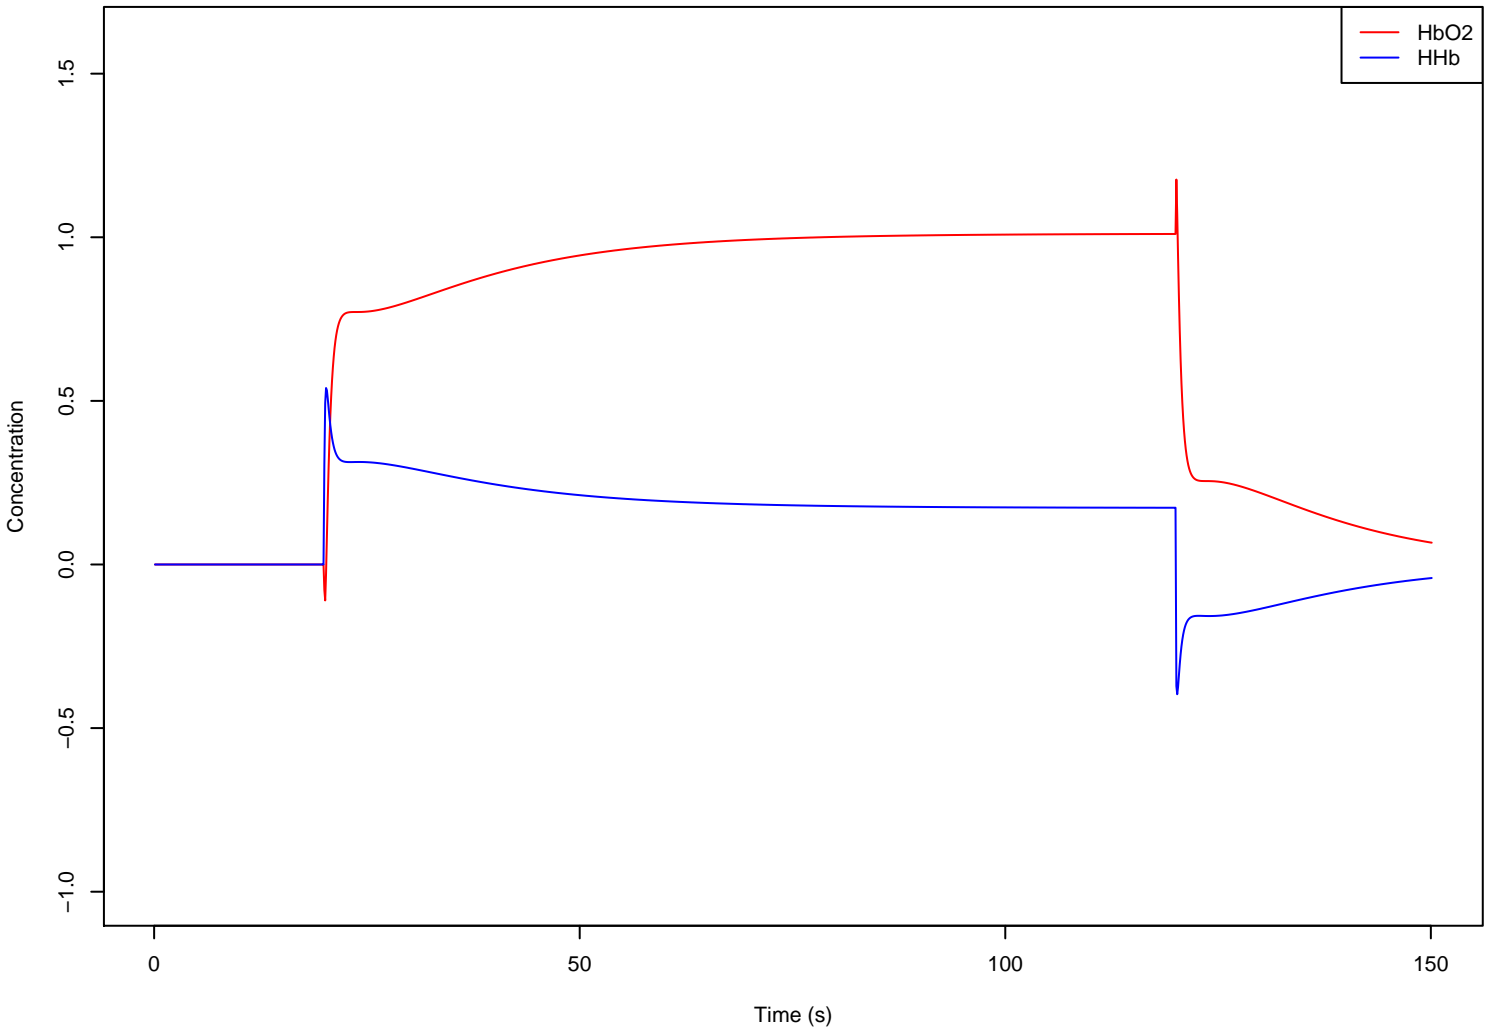

#### Mean Arterial Pressure



#### Arterial CO2



#### Arterial O2 Saturation

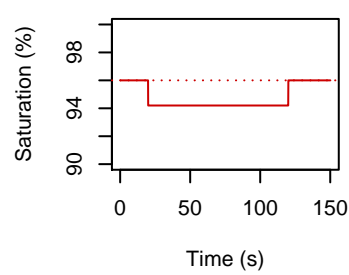

#### Scalp Blood Flux



### False Negative (3), Pressure + CO2 + SaO2 + Scalp (88 %)

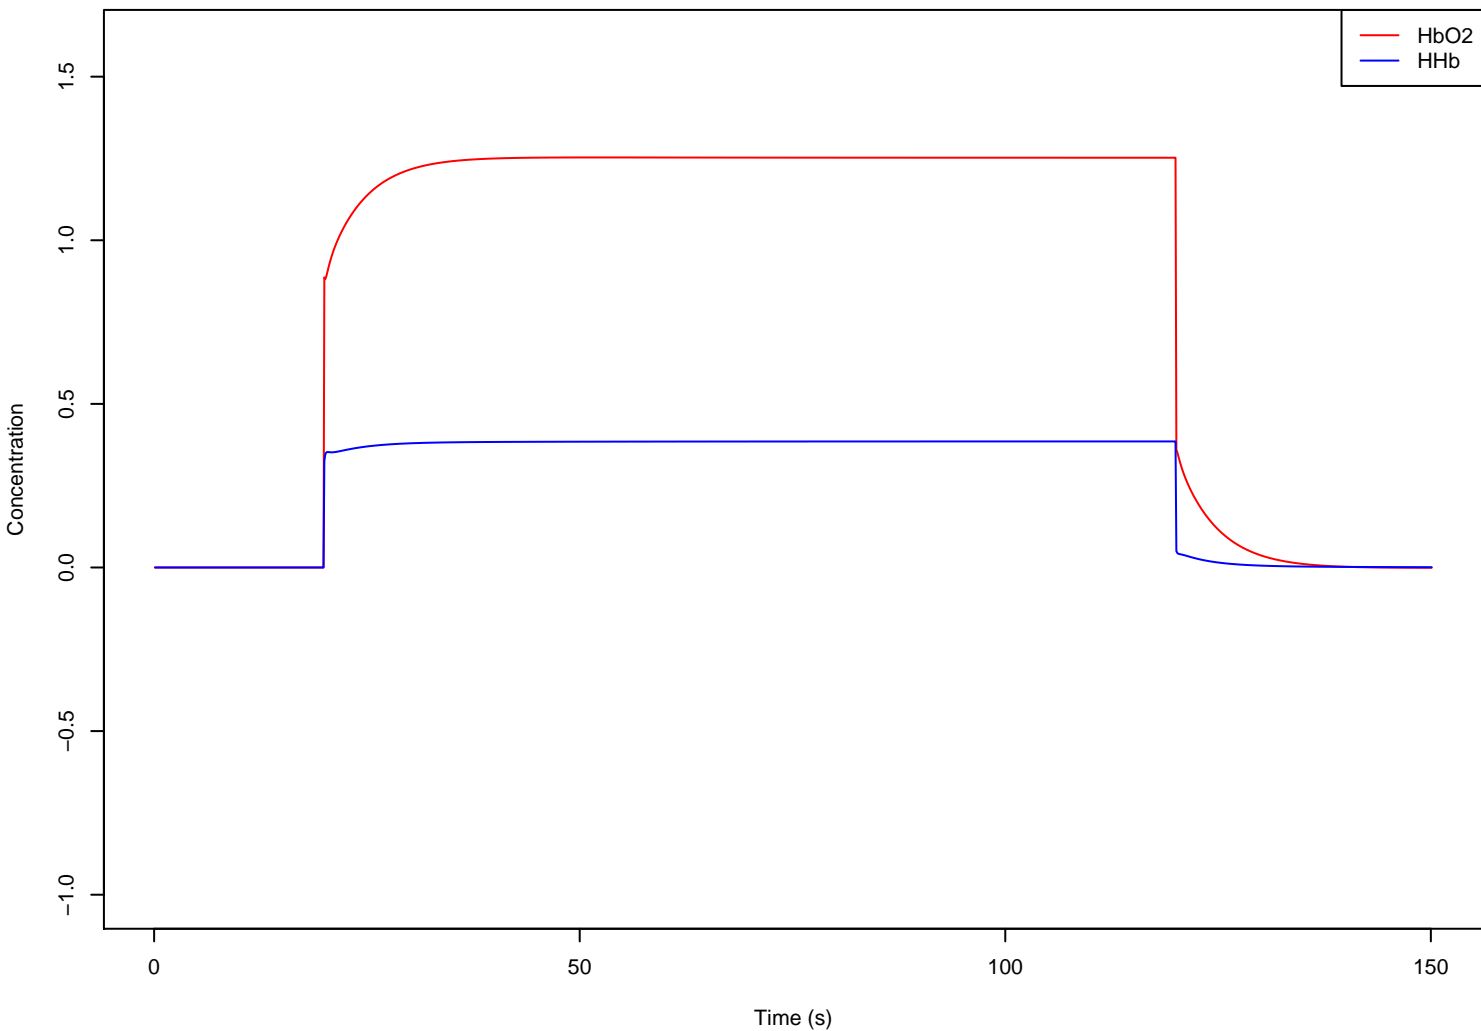

#### Mean Arterial Pressure

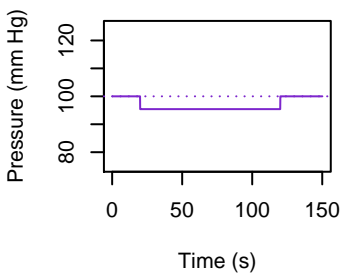

#### Arterial CO2

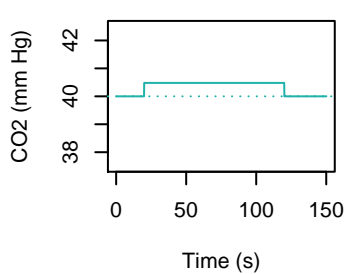

#### Arterial O2 Saturation

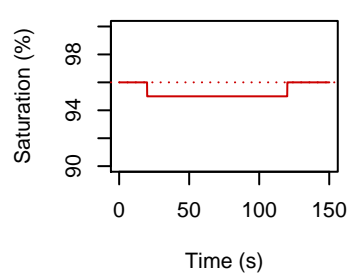

#### Scalp Blood Flux

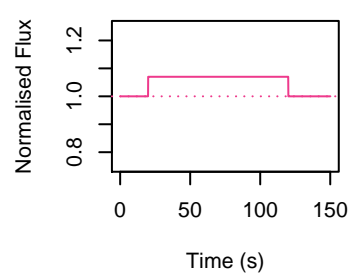

Supplement: mmc4.pdf [file mmc4.pdf]
