# Supplementary material for: Modelling confounding effects from extracerebral contamination and systemic factors on functional near-infrared spectroscopy
Source: PubMed Central journal article supplement (PMC5139986; doi:10.1016/j.neuroimage.2016.08.058), 2016-12
Supplement: mmc2.pdf [file mmc2.pdf]

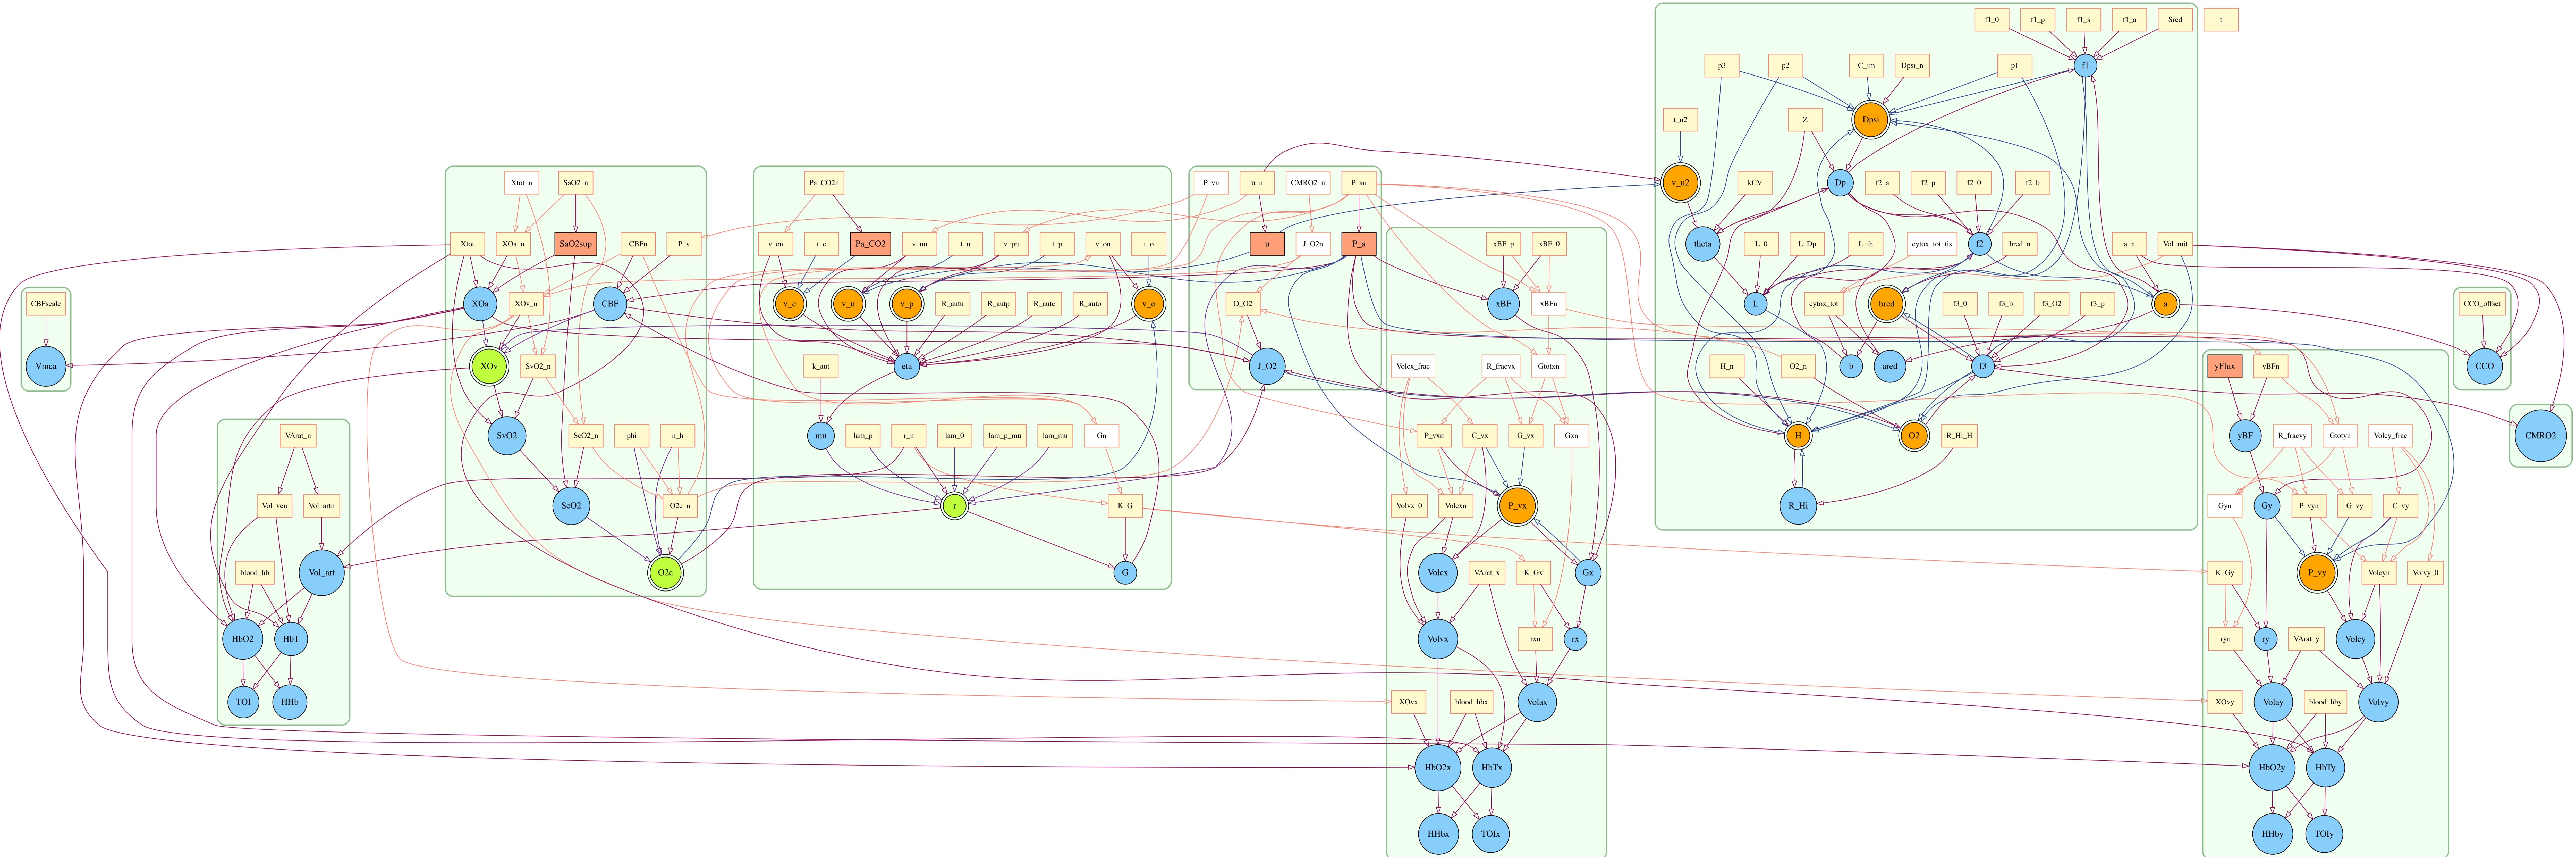

Dependency Graph for model bsx
