# Supplementary material for: Modelling confounding effects from extracerebral contamination and systemic factors on functional near-infrared spectroscopy
Source: PubMed Central journal article supplement (PMC5139986; doi:10.1016/j.neuroimage.2016.08.058), 2016-12
Supplement: mmc3.pdf [file mmc3.pdf]

# bsx

Generated by BCMD module doc\_latex.py

June 28, 2016

## 1 Overview

Extended BrainSignals model, based primarily on the simplified variant B1M2 from BrainSignals Revisited. The metabolic submodel has been modified to improve modelling of functional activation, and an extracerebral blood flow compartment (actually 2 different versions of such a compartment) have been added. The scalp compartments operate in parallel to the cerebral model and do not affect its behaviour.

- 12 differential state variables
- 3 algebraic state variables
- 39 intermediate variables
- 72 independent parameters
- 49 derived parameters
- 5 declared inputs
- 53 default outputs

## 2 Differential Equations

$$\frac{dCu_{A,o}}{dt} = 4f_3 - 4f_1 \quad (1)$$

$$\frac{da_{3,r}}{dt} = 4f_3 - 4f_3 \quad (2)$$

$$\frac{d\psi}{dt} = \frac{p_3 f_3 + p_1 f_1 + p_3 f_3 - L}{C_{im}} \quad (3)$$

$$\frac{dH^+}{dt} = \frac{1}{R_{Hi}} L - \frac{p_3}{R_{Hi}} f_3 - \frac{p_1}{R_{Hi}} f_1 - \frac{p_3}{R_{Hi}} f_3 \quad (4)$$

$$\frac{dO_2}{dt} = \frac{1}{Vol_{mit}} J_{O_2} - f_3 \quad (5)$$

$$\frac{dP_{v,x}}{dt} = \frac{G_x (P_a - P_{v,x}) - P_{v,x} G_{v,x}}{C_{v,x}} \quad (6)$$

$$\frac{dP_{v,y}}{dt} = \frac{G_y (P_a - P_{v,y}) - P_{v,y} G_{v,y}}{C_{v,y}} \quad (7)$$

$$\frac{dv_{CO_2}}{dt} = \frac{1}{\tau_{CO_2}} (Pa_{CO_2} - v_{CO_2}) \quad (8)$$

$$\frac{dv_{O_2}}{dt} = \frac{1}{\tau_{O_2}} (O_{2,c} - v_{O_2}) \quad (9)$$

$$\frac{dv_{P_a}}{dt} = \frac{1}{\tau_{P_a}} (P_a - v_{P_a}) \quad (10)$$

$$\frac{dv_u}{dt} = \frac{1}{\tau_u} (u - v_u) \quad (11)$$

$$\frac{dv_{u,2}}{dt} = \frac{1}{\tau_{u,2}} (u - v_{u,2}) \quad (12)$$

### 3 Algebraic Equations

$$\phi \left( \frac{S_{c,O_2}}{1 - S_{c,O_2}} \right)^{\frac{1}{n_h}} - O_{2,c} = 0 \quad (13)$$

$$\lambda_0 + \frac{\lambda_{P_a}}{P_a} + \lambda_\mu \mu + \frac{\lambda_{P_a, \mu} \mu}{P_a} - r = 0 \quad (14)$$

$$CBF (HbO_{2,a} - HbO_{2,v}) - J_{O_2} = 0 \quad (15)$$

### 4 Chemical Reactions

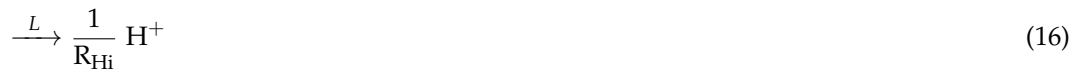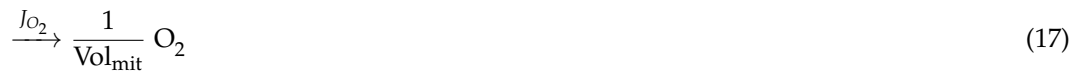

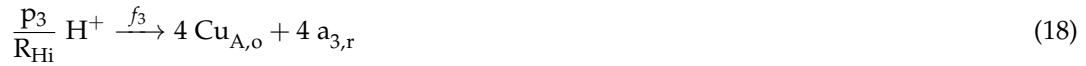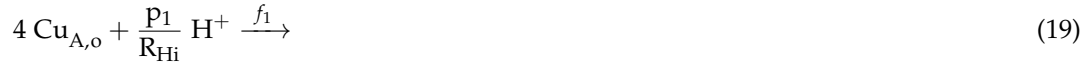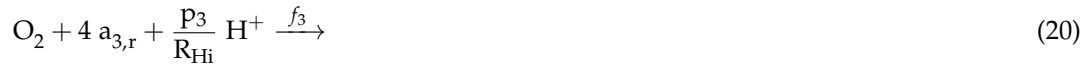

## 5 State Variables

$Cu_{A,o}$

Implementation Name: a  
 Units: mM  
 Initial value:  $Cu_{A,o,n}$   
 Concentration of oxidised cytochrome c oxidase.

$a_{3,r}$

Implementation Name: bred  
 Units: mM  
 Initial value:  $a_{3,r,n}$   
 Concentration of reduced cytochrome  $a_3$ .

$\psi$

Implementation Name: Dpsi  
 Units: mV  
 Initial value:  $\psi_n$   
 Mitochondrial inner membrane potential. Varies as charge (in the form of protons) is transferred across the membrane capacitance.

$H^+$

Implementation Name: H  
 Units: mM  
 Initial value:  $H_n^+$   
 Mitochondrial proton concentration.

$O_2$

Implementation Name: O2  
 Units: mM  
 Initial value:  $O_{2,n}$   
 Mitochondrial oxygen concentration.

$O_{2,c}$

Implementation Name: O2c  
 Units: mM  
 Initial value:  $O_{2,c,n}$   
 Capillary oxygen concentration.

$P_{v,x}$

Implementation Name: P\_vx  
 Units: mmHg  
 Initial value:  $P_{v,x,n}$   
 Pressure drop over the extracerebral venous compartment in the pressure-based model. This also defines the stored volume. The underlying model for this is essentially a 3-element windkessel.

|              |                                                                                                                                                                                                                                                                         |
|--------------|-------------------------------------------------------------------------------------------------------------------------------------------------------------------------------------------------------------------------------------------------------------------------|
| $P_{v,y}$    | Implementation Name: P_vy<br>Units: mmHg<br>Initial value: $P_{v,y,n}$<br>Pressure drop over the extracerebral venous compartment in the flux-based model. This also determines the stored volume. The underlying model for this is essentially a 3-element windkessel. |
| $r$          | Implementation Name: r<br>Units: cm<br>Initial value: $r_n$<br>Typical blood vessel radius.                                                                                                                                                                             |
| $\nu_{CO_2}$ | Implementation Name: v_c<br>Units: mmHg<br>Initial value: $\nu_{CO_2,n}$<br>Filtered carbon dioxide partial pressure.                                                                                                                                                   |
| $\nu_{O_2}$  | Implementation Name: v_o<br>Units: mM<br>Initial value: $\nu_{O_2,n}$<br>Filtered capillary oxygen concentration.                                                                                                                                                       |
| $\nu_{P_a}$  | Implementation Name: v_p<br>Units: mmHg<br>Initial value: $\nu_{P_a,n}$<br>Filtered arterial blood pressure.                                                                                                                                                            |
| $\nu_u$      | Implementation Name: v_u<br>Units: dimensionless<br>Initial value: $\nu_{u,n}$<br>Filtered demand for the haemodynamic submodel.                                                                                                                                        |
| $\nu_{u,2}$  | Implementation Name: v_u2<br>Units: dimensionless<br>Initial value: $u_n$<br>Filtered demand for the metabolic submodel.                                                                                                                                                |
| $HbO_{2,v}$  | Implementation Name: X0v<br>Units: mM<br>Initial value: $HbO_{2,v,n}$<br>Venous concentration of oxygen bound to haemoglobin.                                                                                                                                           |

## 6 Intermediate Variables

|                                   |                                                                                                 |
|-----------------------------------|-------------------------------------------------------------------------------------------------|
| $Cu_{A,r} = CCO_{tot} - Cu_{A,o}$ | Implementation Name: ared<br>Units: mM<br>Initial value: 0<br>Concentration of reduced $Cu_A$ . |
|-----------------------------------|-------------------------------------------------------------------------------------------------|

$$a_{3,o} = CCO_{tot} - a_{3,r}$$

Implementation Name: b

Units: mM

Initial value: 0

Concentration of oxidised cytochrome  $a_3$ .

$$CBF = G (P_a - P_v)$$

Implementation Name: CBF

Units:  $\text{ml}_{blood} \text{ml}_{brain}^{-1} \text{s}^{-1}$

Initial value:  $CBF_n$

Cerebral blood flow.

$$\Delta oxCCO = \Delta oxCCO_{off} + 1000 Vol_{mit} (Cu_{A,o} - Cu_{A,o,n})$$

Implementation Name: CCO

Units: uM

Initial value: 0

Cytochrome c oxidase signal measured by NIRS.

$$CMRO_2 = f_3 Vol_{mit}$$

Implementation Name: CMRO2

Units:  $\text{mM s}^{-1}$

Initial value: 0

Rate of cerebral oxygen metabolism.

$$\Delta p = \psi - Z (4 + \log_{10} (H^+))$$

Implementation Name: Dp

Units: mV

Initial value: 0

Proton motive force across the mitochondrial inner membrane.

$$\eta = R_{P_a} \left( \frac{v_{P_a}}{v_{P_a,n}} - 1 \right) + R_{O_2} \left( \frac{v_{O_2}}{v_{O_2,n}} - 1 \right) + R_{CO_2} \left( 1 - \frac{v_{CO_2}}{v_{CO_2,n}} \right) + R_u \left( 1 - \frac{v_u}{v_{u,n}} \right)$$

Implementation Name: eta

Units: dimensionless

Initial value: 0

Merged autoregulation stimulus.

$$f_1 = \lambda_{f_1} + \lambda_{f_1,s} \log (S_{red}) + \lambda_{f_1,a} \log (Cu_{A,o}) + \lambda_{f_1,p} \Delta p$$

Implementation Name: f1

Units:  $\text{mM s}^{-1}$

Initial value: 0

Reaction rate for the reduction of  $Cu_A$ .

$$f_3 = \lambda_{f_2} + \lambda_{f_2,a} \log (Cu_{A,r}) + \lambda_{f_2,b} \log (a_{3,o}) + \lambda_{f_2,p} \Delta p$$

Implementation Name: f2

Units:  $\text{mM s}^{-1}$

Initial value: 0

Reaction rate for the reduction of  $a_3$ .

$$f_3 = \lambda_{f_3} + \lambda_{f_3,b} \log (a_{3,r}) + \lambda_{f_3,O_2} \log (O_2) + \lambda_{f_3,p} \Delta p$$

Implementation Name: f3

Units:  $\text{mM s}^{-1}$

Initial value: 0

Reaction rate for the reduction of  $O_2$ .

$$G = K_G r^4$$

Implementation Name: G

Units:  $\text{ml}_{blood} \text{ml}_{brain}^{-1} \text{mmHg}^{-1} \text{s}^{-1}$

Initial value: 0

Effective conductance of the whole blood flow compartment.

$$G_x = \frac{xBF}{P_a - P_{v,x}}$$

Implementation Name: Gx

Units:  $\text{ml}_{\text{blood}} \text{ml}_{\text{tissue}}^{-1} \text{mmHg}^{-1} \text{s}^{-1}$

Initial value: 0

Extracerebral conductance in the pressure-based model, inferred from blood flow. (This obviously fails as  $(P_a - P_{v,x})$  approaches zero.)

$$HbO_2 = (V_a HbO_{2,a} + V_v HbO_{2,v}) \text{ blood}_{hb}$$

Implementation Name: HbO2

Units: uM

Initial value: 0

Oxygenated haemoglobin signal measured by NIRS.

$$HbO_{2,x} = (Vol_{a,x} HbO_{2,a} + Vol_{v,x} HbO_{2,v,x}) \text{ blood}_{hb,x}$$

Implementation Name: HbO2x

Units: uM

Initial value: 0

Extracerebral oxygenated haemoglobin in the pressure-based model.

$$HbO_{2,y} = (Vol_{a,y} HbO_{2,a} + Vol_{v,y} HbO_{2,v,y}) \text{ blood}_{hb,y}$$

Implementation Name: HbO2y

Units: uM

Initial value: 0

Extracerebral oxygenated haemoglobin in the flux-based model.

$$HbT = (V_a + V_v) Hb_{tot} \text{ blood}_{hb}$$

Implementation Name: HbT

Units: uM

Initial value: 0

Total haemoglobin signal measured by NIRS.

$$HbT_x = (Vol_{a,x} + Vol_{v,x}) Hb_{tot} \text{ blood}_{hb,x}$$

Implementation Name: HbTx

Units: uM

Initial value: 0

Extracerebral total haemoglobin in the pressure-based model.

$$HbT_y = (Vol_{a,y} + Vol_{v,y}) Hb_{tot} \text{ blood}_{hb,y}$$

Implementation Name: HbTy

Units: uM

Initial value: 0

Extracerebral total haemoglobin in the flux-based model.

$$HHb = HbT - HbO_2$$

Implementation Name: HHb

Units: uM

Initial value: 0

Deoxygenated haemoglobin signal measured by NIRS.

$$HHb_x = HbT_x - HbO_{2,x}$$

Implementation Name: HHbx

Units: uM

Initial value: 0

Extracerebral deoxygenated haemoglobin in the pressure-based model.

$$HHb_y = HbT_y - HbO_{2,y}$$

Implementation Name: HHby

Units: uM

Initial value: 0

Extracerebral deoxygenated haemoglobin in the flux-based model.

$$J_{O_2} = \text{fmin}(D_{O_2}(O_{2,c} - O_2), CBF HbO_{2,a})$$

Implementation Name: J\_O2

Units: mM s<sup>-1</sup>

Initial value: 0

Oxygen flux from blood to tissue.

$$L = \lambda_L + \lambda_{L,\theta} \theta + \lambda_{L,p} \Delta p$$

Implementation Name: L

Units: mM s<sup>-1</sup>

Initial value: 0

Rate of proton return to the mitochondrial matrix.

$$\mu = \frac{k_{aut} (\exp(\eta) - 1)}{\exp(\eta) + 1}$$

Implementation Name: mu

Units: dimensionless

Initial value: 0

Effective strength of the autoregulation reponse.

$$R_{Hi} = \frac{R_{Hi,H}}{H^+}$$

Implementation Name: R\_Hi

Units: dimensionless

Initial value: 0

Relative mitochondrial volume for protons, taking into account buffering effect of pH.

$$r_x = \left( \frac{G_x}{K_{G,x}} \right)^{0.25}$$

Implementation Name: rx

Units: cm

Initial value: 0

Extracerebral vessel radius in the pressure-based model, inferred from conductance.

$$S_{c,O_2} = \frac{S_{a,O_2} + S_{v,O_2}}{2}$$

Implementation Name: ScO2

Units: dimensionless

Initial value:  $S_{c,O_2,n}$

Capillary oxygen saturation.

$$S_{v,O_2} = \frac{HbO_{2,v}}{Hb_{tot}}$$

Implementation Name: SvO2

Units: dimensionless

Initial value:  $S_{v,O_2,n}$

Venous oxygen saturation.

$$\theta = kCV (\Delta p + Z \log_{10}(v_{u,2}) - 90)$$

Implementation Name: theta

Units: dimensionless

Initial value: 0

Driving force Complex V.

$$TOI = \frac{100HbO_2}{HbT}$$

Implementation Name: TOI

Units: dimensionless

Initial value: 0

Total oxygenation index.

$$TOI_x = \frac{100HbO_{2,x}}{HbT_x}$$

Implementation Name: TOIx

Units: dimensionless

Initial value: 0

Extracerebral TOI in the pressure-based model.

$$TOI_y = \frac{100HbO_{2,y}}{HbT_y}$$

Implementation Name: TOIy

Units: dimensionless

Initial value: 0

Extracerebral TOI in the flux-based model.

$$V_{mca} = CBF CBFscale$$

Implementation Name: Vmca

Units:  $cm s^{-1}$

Initial value: 0

Blood velocity in the middle cerebral artery.

$$V_a = V_{a,n} \left( \frac{r}{r_n} \right)^2$$

Implementation Name: Vol\_art

Units: dimensionless

Initial value: 0

Relative arterial blood volume.

$$Vol_{a,x} = \frac{\left( \frac{r_x}{r_{x,n}} \right)^2}{1 + VA_{rat,x}}$$

Implementation Name: Volax

Units: dimensionless

Initial value: 0

Relative extracerebral arterial volume in the pressure-based model, compared to the 'normal' value. Both arterial and venous volumes may vary, but we assume that the balance when all values are normal produces the normal venous/arterial ratio.

$$Vol_{c,x} = P_{v,x} C_{v,x}$$

Implementation Name: Volcx

Units:  $ml_{blood} ml_{tissue}^{-1}$

Initial value:  $Vol_{c,x,n}$

Volume contribution from venous compliance in the pressure-based model. (This is effectively dimensionless, but we specify units to emphasise scaling consistency with the compliance parameter.)

$$Vol_{c,y} = P_{v,y} C_{v,y}$$

Implementation Name: Volcy

Units:  $ml_{blood} ml_{tissue}^{-1}$

Initial value:  $Vol_{c,y,n}$

Volume contribution from venous compliance in the flux-based model. (This is effectively dimensionless, but we specify units to emphasise scaling consistency with the compliance parameter.)

$$Vol_{v,x} = \frac{\left( Vol_{v,x,0} + \frac{Vol_{c,x}}{Vol_{c,x,n}} \right) VA_{rat,x}}{1 + VA_{rat,x}}$$

Implementation Name: Volvx

Units: dimensionless

Initial value: 0

Relative extracerebral venous volume in the pressure-based model. We assume this consists



of a constant base volume plus a fraction that varies with compliance, scaled such that at normality the total is 1.

$$Vol_{v,y} = \frac{\left( Vol_{v,y,0} + \frac{Vol_{c,y}}{Vol_{c,y,n}} \right) VA_{rat,y}}{1 + VA_{rat,y}}$$

Implementation Name: Volvy

Units: dimensionless

Initial value: 0

Relative extracerebral venous volume in the flux-based model. We assume this consists of a constant base volume plus a fraction that varies with compliance, scaled such that at normality the total is 1.

## 7 Parameters

$Cu_{A,o,n}$

Implementation Name: a\_n

Units: mM

Initial value: 0.06567

Normal concentration of oxidised cytochrome c oxidase.

$blood_{hb}$

Implementation Name: blood\_hb

Units: dimensionless

Initial value: 10.00

Factor to convert model haemoglobin concentration to instrumental units. Scales for blood fraction of brain volume, mM to  $\mu\text{M}$ , and number of binding sites.

$blood_{hb,x}$

Implementation Name: blood\_hbx

Units: dimensionless

Initial value: 10.00

Haemoglobin fraction in scalp in the pressure-based model. As with the cerebral fraction, this term combines scaling for units and haemoglobin binding site with a blood fraction estimate.

$blood_{hb,y}$

Implementation Name: blood\_hby

Units: dimensionless

Initial value: 10.00

Haemoglobin fraction in scalp in the flux-based model. As with the cerebral fraction, this term combines scaling for units and haemoglobin binding site with a blood fraction estimate.

$a_{3,r,n}$

Implementation Name: bred\_n

Units: mM

Initial value: 0.001408

Normal concentration of reduced cytochrome a3.

$C_{im}$

Implementation Name: C\_im

Units: mM  $\text{mV}^{-1}$

Initial value: 0.00675

Capacitance of the mitochondrial inner membrane.

$CBF_n$

Implementation Name: CBFn

Units:  $\text{ml}_{\text{blood}} \text{ml}_{\text{brain}}^{-1} \text{s}^{-1}$   
Initial value: 0.0125  
Normal cerebral blood flow.

$CBF_{\text{scale}}$

Implementation Name: `CBFscale`  
Units: cm  
Initial value: 5000  
Scale constant relating blood flow to arterial velocity.

$\Delta \text{oxCCO}_{\text{off}}$

Implementation Name: `CCO_offset`  
Units:  $\mu\text{M}$   
Initial value: 0  
Signal offset for the NIRS CCO measurement.

$CMRO_{2,n}$

Implementation Name: `CMR02_n`  
Units:  $\text{mM s}^{-1}$   
Initial value: 0.034  
Normal metabolic rate of oxygen consumption.

$CCO_{\text{tis}}$

Implementation Name: `cytox_tot_tis`  
Units:  $\text{mM}$   
Initial value: 0.0055  
Concentration of cytochrome c oxidase in tissue.

$\psi_n$

Implementation Name: `Dpsi_n`  
Units: mV  
Initial value: 145  
Normal mitochondrial inner membrane potential.

$\lambda_{f_1}$

Implementation Name: `f1_0`  
Units:  $\text{mM s}^{-1}$   
Initial value: 4.336  
Fitted intercept for the linear model for  $f_1$ .

$\lambda_{f_1,a}$

Implementation Name: `f1_a`  
Units:  $\text{mM s}^{-1}$   
Initial value: 0.7146  
Fitted linear dependence of  $f_1$  on logarithm of  $\text{Cu}_{A,\text{ox}}$ .

$\lambda_{f_1,p}$

Implementation Name: `f1_p`  
Units:  $\text{mM s}^{-1} \text{mV}^{-1}$   
Initial value: -0.01117  
Fitted linear dependence of  $f_1$  on  $\Delta p$ .

$\lambda_{f_1,s}$

Implementation Name: `f1_s`  
Units:  $\text{mM s}^{-1}$   
Initial value: 1  
Fitted linear dependence of  $f_1$  on logarithm of relative supply.

$\lambda_{f_2}$

Implementation Name: `f2_0`  
Units:  $\text{mM s}^{-1}$

Initial value: 10.41  
 Fitted intercept for the linear model for  $f_2$ .

$\lambda_{f_2,a}$   
 Implementation Name: f2\_a  
 Units: mM s<sup>-1</sup>  
 Initial value: -0.1137  
 Fitted linear dependence of  $f_2$  on logarithm of Cu<sub>A,red</sub>.

$\lambda_{f_2,b}$   
 Implementation Name: f2\_b  
 Units: mM s<sup>-1</sup>  
 Initial value: 3.188  
 Fitted linear dependence of  $f_2$  on logarithm of a<sub>3,ox</sub>.

$\lambda_{f_2,p}$   
 Implementation Name: f2\_p  
 Units: mM s<sup>-1</sup> mV<sup>-1</sup>  
 Initial value: -0.01390  
 Fitted linear dependence of  $f_2$  on  $\Delta p$ .

$\lambda_{f_3}$   
 Implementation Name: f3\_0  
 Units: mM s<sup>-1</sup>  
 Initial value: 9.282  
 Fitted intercept for the linear model for  $f_3$ .

$\lambda_{f_3,b}$   
 Implementation Name: f3\_b  
 Units: mM s<sup>-1</sup>  
 Initial value: 0.2324  
 Fitted linear dependence of  $f_3$  on logarithm of a<sub>3,red</sub>.

$\lambda_{f_3,O_2}$   
 Implementation Name: f3\_02  
 Units: mM s<sup>-1</sup>  
 Initial value: 0.2918  
 Fitted linear dependence of  $f_3$  on logarithm of O<sub>2</sub>.

$\lambda_{f_3,p}$   
 Implementation Name: f3\_p  
 Units: mM s<sup>-1</sup> mV<sup>-1</sup>  
 Initial value: -0.03654  
 Fitted linear dependence of  $f_3$  on  $\Delta p$ .

$H_n^+$   
 Implementation Name: H\_n  
 Units: mM  
 Initial value: 0.00003981  
 Normal mitochondrial proton concentration.

$k_{aut}$   
 Implementation Name: k\_aut  
 Units: dimensionless  
 Initial value: 1  
 Overall functioning of autoregulatory response.

$k_{CV}$   
 Implementation Name: kCV  
 Units: mV<sup>-1</sup>

Initial value: 0.02047339  
 Factor relating the Complex V driving force to the membrane potential and demand.

$\lambda_L$   
 Implementation Name: L\_0  
 Units: mM s<sup>-1</sup>  
 Initial value: -14.86  
 Fitted intercept for the linear model for  $L$ .

$\lambda_{L,p}$   
 Implementation Name: L\_Dp  
 Units: mM s<sup>-1</sup> mV<sup>-1</sup>  
 Initial value: 0.09440  
 Fitted linear dependence of  $L$  on  $\Delta p$ .

$\lambda_{L,\theta}$   
 Implementation Name: L\_th  
 Units: mM s<sup>-1</sup>  
 Initial value: 5.653  
 Fitted linear dependence of  $L$  on  $\theta$ .

$\lambda_0$   
 Implementation Name: lam\_0  
 Units: cm  
 Initial value: 0.02507  
 Intercept of the fitted linear model for blood vessel radius.

$\lambda_\mu$   
 Implementation Name: lam\_mu  
 Units: cm  
 Initial value: -0.0004422  
 Fitted linear dependence of blood vessel radius on autoregulatory stimuli.

$\lambda_{P_a}$   
 Implementation Name: lam\_p  
 Units: cm mmHg  
 Initial value: -0.6327  
 Fitted linear dependence of blood vessel radius on reciprocal of blood pressure.

$\lambda_{P_a,\mu}$   
 Implementation Name: lam\_p\_mu  
 Units: cm mmHg  
 Initial value: -0.5286  
 Fitted joint dependence of blood vessel radius on autoregulatory stimuli and reciprocal of blood pressure.

$n_h$   
 Implementation Name: n\_h  
 Units: dimensionless  
 Initial value: 2.5  
 Hill coefficient for oxygen dissociation from haemoglobin.

$O_{2,n}$   
 Implementation Name: O2\_n  
 Units: mM  
 Initial value: 0.024  
 Normal mitochondrial oxygen concentration.

$p_1$   
 Implementation Name: p1  
 Units: dimensionless

Initial value: 12  
Proton cost of the reaction reducing  $\text{Cu}_A$ .

$p_3$   
Implementation Name: p2  
Units: dimensionless  
Initial value: 4  
Proton cost of the reaction reducing  $a_3$ .

$p_3$   
Implementation Name: p3  
Units: dimensionless  
Initial value: 4  
Proton cost of the reaction reducing  $\text{O}_2$ .

$P_{a,n}$   
Implementation Name: P\_an  
Units: mmHg  
Initial value: 100  
Normal arterial blood pressure.

$P_{v,n}$   
Implementation Name: P\_vn  
Units: mmHg  
Initial value: 4  
Normal venous blood pressure.

$P_{a\text{CO}_2,n}$   
Implementation Name: Pa\_CO2n  
Units: mmHg  
Initial value: 40  
Normal arterial partial pressure of carbon dioxide.

$\phi$   
Implementation Name: phi  
Units: mM  
Initial value: 0.036  
Oxygen concentration at half-maximal saturation.

$R_{\text{CO}_2}$   
Implementation Name: R\_autc  
Units: dimensionless  
Initial value: 2.2  
Autoregulatory reactivity to carbon dioxide.

$R_{\text{O}_2}$   
Implementation Name: R\_auto  
Units: dimensionless  
Initial value: 1.5  
Autoregulatory reactivity to oxygen.

$R_{P_a}$   
Implementation Name: R\_autp  
Units: dimensionless  
Initial value: 4  
Autoregulatory reactivity to blood pressure.

$R_u$   
Implementation Name: R\_autu  
Units: dimensionless

Initial value: 0.5  
Autoregulatory reactivity to demand.

$R_{frac,v,x}$

Implementation Name: R\_fracvx  
Units: dimensionless  
Initial value: 0.1  
Fraction of normal total resistance that resides in the venous compartment in the pressure-based model. We expect this to be small in general.

$R_{frac,v,y}$

Implementation Name: R\_fracvy  
Units: dimensionless  
Initial value: 0.1  
Fraction of normal total resistance that resides in the venous compartment in the flux-based model. We expect this to be small in general.

$R_{Hi,H}$

Implementation Name: R\_Hi\_H  
Units: mM  
Initial value: 9.565483  
Proton buffering factor.

$r_n$

Implementation Name: r\_n  
Units: cm  
Initial value: 0.0187  
Normal effective blood vessel radius.

$S_{a,O_2,n}$

Implementation Name: SaO2\_n  
Units: dimensionless  
Initial value: 0.96  
Normal arterial oxygen saturation.

$S_{red}$

Implementation Name: Sred  
Units: not defined  
Initial value: 1  
Parameter representing the relative supply of reducing substrate. This is normally 1, and the dependency in f1 is logarithmic, so this term normally disappears, but we may adjust it later to investigate supply restrictions.

$t$

Implementation Name: t  
Units: s  
Initial value: 0  
Time over which the system evolves.

$\tau_{CO_2}$

Implementation Name: t\_c  
Units: s  
Initial value: 5  
Filter time constant for stimulus effect of carbon dioxide.

$\tau_{O_2}$

Implementation Name: t\_o  
Units: s  
Initial value: 20  
Filter time constant for stimulus effect of capillary oxygen.

$\tau_{p_a}$   
Implementation Name: `t_p`  
Units: s  
Initial value: 5  
Filter time constant for stimulus effect of blood pressure.

$\tau_u$   
Implementation Name: `t_u`  
Units: s  
Initial value: 0.5  
Filter time constant for stimulus effect of demand.

$\tau_{u,2}$   
Implementation Name: `t_u2`  
Units: s  
Initial value: 0.5  
Filter time constant for metabolic effect of demand.

$u_n$   
Implementation Name: `u_n`  
Units: dimensionless  
Initial value: 1  
Normal demand.

$VA_{rat,n}$   
Implementation Name: `VArat_n`  
Units: dimensionless  
Initial value: 3  
Normal volume ratio of veins to arteries in brain tissue.

$VA_{rat,x}$   
Implementation Name: `VArat_x`  
Units: dimensionless  
Initial value: 3  
‘Normal’ ratio of extracerebral veins to arteries in the pressure-based model.

$VA_{rat,y}$   
Implementation Name: `VArat_y`  
Units: dimensionless  
Initial value: 3  
‘Normal’ ratio of extracerebral veins to arteries in the flux-based model.

$Vol_{mit}$   
Implementation Name: `Vol_mit`  
Units: dimensionless  
Initial value: 0.067  
Fraction of brain tissue volume that is mitochondria.

$Vol_{c,x,frac}$   
Implementation Name: `Volcx_frac`  
Units: dimensionless  
Initial value: 0.1  
Fraction of normal venous volume that is due to the venous compliance in the pressure-based model. This volume is subject to variation when the system is not at baseline, whereas the remainder is constant.

$Vol_{c,y,frac}$   
Implementation Name: `Volcy_frac`  
Units: dimensionless  
Initial value: 0.1

Fraction of normal venous volume that is due to the venous compliance in the flux-based model. This volume is subject to variation when the system is not at baseline, whereas the remainder is constant.

$\lambda_{E_x}$

Implementation Name: xBF\_0

Units:  $\text{ml}_{blood} 100 \text{ ml}_{tissue}^{-1} \text{ min}^{-1}$

Initial value: -13.4

Intercept of blood flow linear model in the pressure-based model. Fitted from data in Gagnon et al (2014).

$\lambda_{E_{x,p}}$

Implementation Name: xBF\_p

Units:  $\text{ml}_{blood} 100 \text{ ml}_{tissue}^{-1} \text{ min}^{-1} \text{ mmHg}^{-1}$

Initial value: 0.48

Dependence of extracerebral blood flow on  $P_a$  in the pressure-based model. Fitted from data in Gagnon et al (2014).

$Hb_{tot}$

Implementation Name: Xtot

Units: mM

Initial value: 9.1

Total concentration of haemoglobin O<sub>2</sub> binding sites in blood (4 times haemoglobin concentration).

$Hb_{tot,n}$

Implementation Name: Xtot\_n

Units: mM

Initial value: 9.1

Normal total concentration of haemoglobin O<sub>2</sub> binding sites in blood (4 times haemoglobin concentration).

$yFlux$

Implementation Name: yFlux

Units: not defined

Initial value: 1

Superficial blood "flux" from Laser Doppler or equivalent instrumentation. This does not provide an absolute measurement, but instead is relative to some baseline condition which is (of course) unknown and hence has a basically arbitrary scale and offset. We assume that this has been factored out such that yFlux is equal to 1 at yBFn.

Z

Implementation Name: Z

Units: mV

Initial value: 59.028

Proportionality constant in calculation of driving forces due to concentration differences. Defined as  $RT/F$ , where  $F$  is Faraday's constant,  $R$  the ideal gas constant and  $T$  the absolute temperature.

## 8 Derived Parameters

$C_{v,x}$

Implementation Name: C\_vx

Units:  $\text{ml}_{blood} \text{ ml}_{tissue}^{-1} \text{ mmHg}^{-1}$

Initial value:  $\frac{0.00051}{Vol_{c,x,frac}}$

Compliance of the venous compartment in the pressure-based model. Decent estimates for



the scalp are elusive, but we start with a ballpark for peripheral veins in general from Olsen and Länne (1998). They find lower body compliance of 0.051 ml per 100 ml per mmHg in young subjects. We scale this to account for the compliant volume fraction and the units change.

$C_{v,y}$

Implementation Name: C\_vy  
 Units:  $\text{ml}_{blood} \text{ml}_{tissue}^{-1} \text{mmHg}^{-1}$   
 Initial value:  $\frac{0.00051}{Vol_{c,y,frac}}$

Compliance of the venous compartment in the flux-based model. Decent estimates for the scalp are elusive, but we start with a ballpark for peripheral veins in general from Olsen and Länne (1998). They find lower body compliance of 0.051 ml per 100 ml per mmHg in young subjects. We scale this to account for the compliant volume fraction and the units change.

$CCO_{tot}$

Implementation Name: cytox\_tot  
 Units: mM  
 Initial value:  $\frac{CCO_{tis}}{Vol_{mit}}$   
 Concentration of cytochrome c oxidase in mitochondria.

$D_{O_2}$

Implementation Name: D\_O2  
 Units:  $\text{s}^{-1}$   
 Initial value:  $\frac{J_{O_2,n}}{O_{2,c,n} - O_{2,n}}$   
 Diffusion rate for oxygen between capillaries and mitochondria.

$G_{v,x}$

Implementation Name: G\_vx  
 Units:  $\text{ml}_{blood} \text{ml}_{tissue}^{-1} \text{mmHg}^{-1} \text{s}^{-1}$   
 Initial value:  $\frac{G_{tot,x,n}}{R_{frac,v,x}}$   
 Conductance of the venous compartment in the pressure-based model. This is assumed constant.

$G_{v,y}$

Implementation Name: G\_vy  
 Units:  $\text{ml}_{blood} \text{ml}_{tissue}^{-1} \text{mmHg}^{-1} \text{s}^{-1}$   
 Initial value:  $\frac{G_{tot,y,n}}{R_{frac,v,y}}$   
 Conductance of the venous compartment in the flux-based model. This is assumed constant.

$G_n$

Implementation Name: Gn  
 Units:  $\text{ml}_{blood} \text{ml}_{brain}^{-1} \text{mmHg}^{-1} \text{s}^{-1}$   
 Initial value:  $\frac{CBF_n}{P_{a,n} - P_{v,n}}$   
 Normal blood vessel conductance.

$G_{tot,x,n}$

Implementation Name: Gtotxn  
 Units:  $\text{ml}_{blood} \text{ml}_{tissue}^{-1} \text{mmHg}^{-1} \text{s}^{-1}$   
 Initial value:  $\frac{xBF_n}{P_{a,n}}$   
 ‘Normal’ total extracerebral conductance in the pressure-based model, i.e. conductance for normal flow at normal systemic and venous pressures.

$G_{tot,y,n}$

Implementation Name: Gtotyn

Units:  $\text{ml}_{blood} \text{ml}_{tissue}^{-1} \text{mmHg}^{-1} \text{s}^{-1}$

Initial value:  $\frac{yBF_n}{P_{a,n}}$

'Normal' total extracerebral conductance in the flux-based model, i.e. conductance for normal flow at normal systemic and venous pressures.

$G_{x,n}$

Implementation Name: Gxn

Units:  $\text{ml}_{blood} \text{ml}_{tissue}^{-1} \text{mmHg}^{-1} \text{s}^{-1}$

Initial value:  $\frac{G_{tot,x,n}}{1 - R_{frac,v,x}}$

Normal conductance of the arterial compartment in the pressure-based model.

$G_y = \frac{yBF}{P_a}$

Implementation Name: Gy

Units:  $\text{ml}_{blood} \text{ml}_{tissue}^{-1} \text{mmHg}^{-1} \text{s}^{-1}$

Initial value: 0

Extracerebral conductance in the flux-based model, inferred from flow.

$G_{y,n}$

Implementation Name: Gyn

Units:  $\text{ml}_{blood} \text{ml}_{tissue}^{-1} \text{mmHg}^{-1} \text{s}^{-1}$

Initial value:  $\frac{G_{tot,y,n}}{1 - R_{frac,v,y}}$

Normal conductance of the arterial compartment in the flux-based model.

$J_{O_2,n}$

Implementation Name: J\_O2n

Units:  $\text{mM s}^{-1}$

Initial value:  $CMRO_{2,n}$

Normal oxygen flux from blood to tissue.

$K_G$

Implementation Name: K\_G

Units:  $\text{ml}_{blood} \text{ml}_{brain}^{-1} \text{mmHg}^{-1} \text{s}^{-1} \text{cm}^{-4}$

Initial value:  $\frac{G_n}{r_n^4}$

Proportionality constant in Poiseuille relation for conductance.

$K_{G,x}$

Implementation Name: K\_Gx

Units:  $\text{ml}_{blood} \text{ml}_{tissue}^{-1} \text{mmHg}^{-1} \text{s}^{-1} \text{cm}^{-4}$

Initial value:  $K_G$

Conductance/flow proportionality constant for extracerebral vessels in the pressure-based model. Since we have no basis for setting this, for the moment we just assume it matches the internal value.

$K_{G,y}$

Implementation Name: K\_Gy

Units:  $\text{ml}_{blood} \text{ml}_{tissue}^{-1} \text{mmHg}^{-1} \text{s}^{-1} \text{cm}^{-4}$

Initial value:  $K_G$

Conductance/flow proportionality constant for extracerebral vessels in the flux-based model. Since we have no basis for setting this, for the moment we just assume it matches the internal value.

$O_{2,c,n}$

Implementation Name: 02c\_n

Units: mM

Initial value:  $\phi \left( \frac{S_{c,O_2,n}}{1 - S_{c,O_2,n}} \right)^{\frac{1}{n_h}}$

Normal capillary oxygen concentration.

$P_a$

Implementation Name: P\_a

Units: mmHg

Initial value:  $P_{a,n}$

Mean arterial blood pressure.

$P_v$

Implementation Name: P\_v

Units: mmHg

Initial value:  $P_{v,n}$

Venous blood pressure.

$P_{v,x,n}$

Implementation Name: P\_vxn

Units: mmHg

Initial value:  $R_{frac,v,x} P_{a,n}$

Normal venous pressure in the pressure-based model. At normal arterial pressure and normal conductance the venous compliance should be steady and the total resistance should divide according to  $R_{frac,v,x}$ .

$P_{v,y,n}$

Implementation Name: P\_vyn

Units: mmHg

Initial value:  $R_{frac,v,y} P_{a,n}$

Normal venous pressure in the flux-based model. At normal arterial pressure and normal conductance the venous compliance should be steady and the total resistance should divide according to  $R_{frac,v,y}$ .

$Pa_{CO_2}$

Implementation Name: Pa\_CO2

Units: mmHg

Initial value:  $Pa_{CO_2,n}$

Arterial partial pressure of carbon dioxide.

$r_{x,n}$

Implementation Name: rxn

Units: cm

Initial value:  $\left( \frac{G_{x,n}}{K_{G,x}} \right)^{0.25}$

'Normal' extracerebral vessel radius in the pressure-based model. This is the value implied by normal conductance of the arterial compartment. (Venous compartment is assumed not to contribute to the flow variability.)

$r_y = \left( \frac{G_y}{K_{G,y}} \right)^{0.25}$

Implementation Name: ry

Units: cm

Initial value: 0

Extracerebral vessel radius in the flux-based model, inferred from conductance. We assume that the proportionality constant here is the same as for the cerebral model. This probably is not the case, but we have no basis for making a different estimate; this at least has the benefit of consistency.

$r_{y,n}$

Implementation Name: ryn

Units: cm

Initial value:  $\left(\frac{G_{y,n}}{K_{G,y}}\right)^{0.25}$

'Normal' extracerebral vessel radius in the flux-based model. This is the value implied by the normal conductance of the arterial compartment. (The venous compartment is assumed not to contribute to the flow variability.)

$S_{a,O_2}$

Implementation Name: Sa02sup

Units: dimensionless

Initial value:  $S_{a,O_2,n}$

Arterial oxygen saturation.

$S_{c,O_2,n}$

Implementation Name: Sc02\_n

Units: dimensionless

Initial value:  $\frac{S_{a,O_2,n} + S_{v,O_2,n}}{2}$

Normal capillary oxygen saturation.

$S_{v,O_2,n}$

Implementation Name: Sv02\_n

Units: dimensionless

Initial value:  $\frac{HbO_{2,v,n}}{Hb_{tot,n}}$

Normal venous oxygen saturation.

$u$

Implementation Name: u

Units: dimensionless

Initial value:  $u_n$

Parameter indicating metabolic demand.

$v_{CO_2,n}$

Implementation Name: v\_cn

Units: mmHg

Initial value:  $Pa_{CO_2,n}$

Normal filtered carbon dioxide partial pressure.

$v_{O_2,n}$

Implementation Name: v\_on

Units: mM

Initial value:  $O_{2,c,n}$

Normal filtered capillary oxygen concentration.

$v_{P_a,n}$

Implementation Name: v\_pn

Units: mmHg

Initial value:  $P_{a,n}$

Normal filtered arterial blood pressure.

$v_{u,n}$

Implementation Name: v\_un

Units: dimensionless

Initial value:  $u_n$

Normal filtered demand.

$$V_{a,n} = \frac{1}{1 + VArat_n}$$

Implementation Name: Vol\_artn  
 Units: dimensionless  
 Initial value: 0  
 Normal relative arterial blood volume.

$$V_v = \frac{VArat_n}{1 + VArat_n}$$

Implementation Name: Vol\_ven  
 Units: dimensionless  
 Initial value: 0  
 Relative venous blood volume.

$$Vol_{a,y} = \frac{\left(\frac{r_y}{r_{y,n}}\right)^2}{1 + VArat,y}$$

Implementation Name: Volay  
 Units: dimensionless  
 Initial value: 0

Relative extracerebral arterial volume in the flux-based model, compared to the 'normal' value. Both arterial and venous volumes may vary, but we assume that the balance when all values are normal produces the normal venous/arterial ratio.

$$Vol_{c,x,n}$$

Implementation Name: Volcxn

Units:  $\text{ml}_{blood} \text{ml}_{tissue}^{-1}$

Initial value:  $\frac{C_{v,x} P_{v,x,n}}{Vol_{c,x,frac}}$

Normal compliance-dependent venous volume in the pressure-based model. (This is effectively dimensionless, but we specify units to emphasise scaling consistency with the compliance parameter.)

$$Vol_{c,y,n}$$

Implementation Name: Volcyn

Units:  $\text{ml}_{blood} \text{ml}_{tissue}^{-1}$

Initial value:  $\frac{C_{v,y} P_{v,y,n}}{Vol_{c,y,frac}}$

Normal compliance-dependent venous volume in the flux-based model. (This is effectively dimensionless, but we specify units to emphasise scaling consistency with the compliance parameter.)

$$Vol_{v,x,0}$$

Implementation Name: Volvx\_0

Units: dimensionless

Initial value:  $1 - Vol_{c,x,frac}$

Compliance-independent (ie, constant) contribution to venous volume in the pressure-based model.

$$Vol_{v,y,0}$$

Implementation Name: Volvy\_0

Units: dimensionless

Initial value:  $1 - Vol_{c,y,frac}$

Compliance-independent (ie, constant) contribution to venous volume in the flux-based model.

$$xBF = \frac{P_a \lambda_{F_x,p} + \lambda_{F_x}}{6000}$$

Implementation Name: xBF

Units:  $\text{ml}_{blood} \text{ml}_{tissue}^{-1} \text{s}^{-1}$

Initial value: 0

Extracerebral blood flow in the pressure-based model. At present we assume that this is

dependent solely on arterial pressure, with a simple linear model fitted from data in Gagnon et al (2014). The denominator of 6000 is for unit conversion.

$xBF_n$

Implementation Name:  $xBF_n$

Units:  $\text{ml}_{blood} \text{ml}_{issue}^{-1} \text{s}^{-1}$

Initial value:  $\frac{P_{a,n} \lambda_{F_x,p} - \lambda_{F_x}}{6000}$

'Normal' extracerebral blood flow in the pressure-based model, i.e. flow at normal pressure.

$HbO_{2,a} = Hb_{tot} S_{a,O_2}$

Implementation Name:  $X0a$

Units: mM

Initial value:  $HbO_{2,a,n}$

Arterial concentration of oxygen bound to haemoglobin.

$HbO_{2,a,n}$

Implementation Name:  $X0a_n$

Units: mM

Initial value:  $Hb_{tot,n} S_{a,O_2,n}$

Normal arterial concentration of oxygen bound to haemoglobin.

$HbO_{2,v,n}$

Implementation Name:  $X0v_n$

Units: mM

Initial value:  $\frac{CBF_n HbO_{2,a,n} - J_{O_2,n}}{CBF_n}$

Normal venous concentration of oxygen bound to haemoglobin.

$HbO_{2,v,x}$

Implementation Name:  $X0vx$

Units: mM

Initial value:  $HbO_{2,v,n}$

Venous concentration of oxygen bound to haemoglobin in the extracerebral tissue in the pressure-based model. Since we do not model oxygen consumption in the extracerebral model, we assume this is constant and currently just import the baseline value from the cerebral model.

$HbO_{2,v,y}$

Implementation Name:  $X0vy$

Units: mM

Initial value:  $HbO_{2,v,n}$

Venous concentration of oxygen bound to haemoglobin in the extracerebral tissue in the flux-based model. Since we do not model oxygen consumption in the extracerebral model, we assume this is constant and currently just import the baseline value from the cerebral model.

$yBF = yFlux yBF_n$

Implementation Name:  $yBF$

Units:  $\text{ml}_{blood} \text{ml}_{issue}^{-1} \text{s}^{-1}$

Initial value: 0

Extracerebral blood flow in the flux-based model. For the moment we assume it can be estimated directly from the flux.

$yBF_n$

Implementation Name:  $yBF_n$

Units:  $\text{ml}_{blood} \text{ml}_{issue}^{-1} \text{s}^{-1}$

Initial value:  $xBF_n$

'Normal' extracerebral blood flow in the flux-based model, i.e. when normalised flux = 1. At the moment we use the same value as the pressure model at normal pressure.
